# Supplementary material for: Dying to be famous: retrospective cohort study of rock and pop star mortality and its association with adverse childhood experiences
Source: PubMed Central journal article supplement — BMJ Open. 2012 Dec 19;2(6):e002089. doi: 10.1136/bmjopen-2012-002089 (PMC3533086; doi:10.1136/bmjopen-2012-002089), 2012-12-19
Supplement: bmjopen-2012-002089.draft_revisions.pdf [file bmjopen-2012-002089.draft_revisions.pdf]

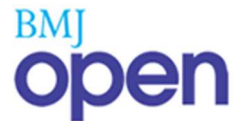

**Dying to be famous: retrospective cohort study of rock and pop star mortality and its association with adverse childhood experiences**

|                                 |                                                                                                                                                                                                                                                                                                                                                                   |
|---------------------------------|-------------------------------------------------------------------------------------------------------------------------------------------------------------------------------------------------------------------------------------------------------------------------------------------------------------------------------------------------------------------|
| Journal:                        | <i>BMJ Open</i>                                                                                                                                                                                                                                                                                                                                                   |
| Manuscript ID:                  | bmjopen-2012-002089                                                                                                                                                                                                                                                                                                                                               |
| Article Type:                   | Research                                                                                                                                                                                                                                                                                                                                                          |
| Date Submitted by the Author:   | 10-Sep-2012                                                                                                                                                                                                                                                                                                                                                       |
| Complete List of Authors:       | Bellis, Mark; Liverpool John Moores, Centre for Public Health<br>Hughes, Karen; Liverpool John Moores University, Centre for Public Health<br>Sharples, Olivia; Liverpool John Moores University, Centre for Public Health<br>Hennell, Tom; Department of Health, North West<br>Hardcastle, Katherine; Liverpool John Moores University, Centre for Public Health |
| <b>Primary Subject Heading</b>: | Public health                                                                                                                                                                                                                                                                                                                                                     |
| Secondary Subject Heading:      | Addiction, Epidemiology, Occupational and environmental medicine                                                                                                                                                                                                                                                                                                  |
| Keywords:                       | PUBLIC HEALTH, EPIDEMIOLOGY, OCCUPATIONAL & INDUSTRIAL MEDICINE, Community child health < PAEDIATRICS                                                                                                                                                                                                                                                             |
|                                 |                                                                                                                                                                                                                                                                                                                                                                   |

SCHOLARONE™  
Manuscripts

1  
2  
3 **Dying to be famous: retrospective cohort study of rock and pop star mortality**  
4 **and its association with adverse childhood experiences**  
5  
6  
7  
8

9 Mark A. Bellis,<sup>1</sup> Karen Hughes,<sup>1</sup> Olivia Sharples,<sup>1</sup> Tom Hennell,<sup>2</sup> Katherine A  
10 Hardcastle<sup>1</sup>  
11  
12

13  
14  
15  
16 <sup>1</sup> Centre for Public Health, Liverpool John Moores University, 15-21 Webster Street,  
17 Liverpool, UK  
18

19  
20 <sup>2</sup> Department of Health – North West, 3 Piccadilly Place, Manchester, UK  
21  
22

23  
24 Correspondence to:  
25

26  
27 Professor Mark A Bellis, Centre for Public Health, Liverpool John Moores University,  
28 15-21 Webster Street, Liverpool L3 2ET, UK  
29

30  
31 Email: [m.a.bellis@ljmu.ac.uk](mailto:m.a.bellis@ljmu.ac.uk)  
32

33  
34  
35 Telephone: +44 (0)151 231 4511  
36

37  
38  
39 Fax: +44 (0)151 231 4552  
40  
41

42  
43  
44  
45  
46 Key words: Fame, Alcohol, Drugs, Mortality, Childhood  
47

48  
49 Word count: 3140  
50  
51  
52  
53  
54  
55  
56  
57  
58  
59  
60

## ABSTRACT

**Objectives:** Rock and pop fame is associated with risk taking, substance use and premature mortality. We examine relationships between fame and premature mortality and test how such relationships vary with type of artist (e.g. solo or band member) and nationality and whether cause of death is linked with pre-fame (adverse childhood) experiences.

**Design:** A retrospective cohort analysis based on biographical data. An actuarial methodology compares post fame mortality to matched general populations. Cox survival and logistic regression techniques examine risk and protective factors for survival and links between adverse childhood experiences and cause of death respectively.

**Setting:** North America and Europe.

**Participants:** 1489 rock and pop stars reaching fame between 1956 and 2006.

**Outcomes:** Stars' post fame mortality relative to age, sex and ethnicity matched populations (USA and UK); variations in survival with performer type, and in cause of mortality with exposure to adverse childhood experiences.

**Results:** Rock/pop star mortality increases relative to the general population with time since fame. Increases are greater in North American stars and those with solo careers. Relative mortality begins to recover 25 years after fame in European but not North American stars. Those reaching fame from 1980 onwards have better survival rates. For deceased stars, cause of death was more likely to be substance use or risk-related in those with more adverse childhood experiences.

**Conclusions:** Relationships between fame and mortality vary with performers' characteristics. Adverse experiences in early life may leave some predisposed to health-damaging behaviours, with celebrity and extreme wealth providing greater

1  
2  
3  
4  
5  
6  
7  
8  
9  
10  
11  
12  
13  
14  
15  
16  
17  
18  
19  
20  
21  
22  
23  
24  
25  
26  
27  
28  
29  
30  
31  
32  
33  
34  
35  
36  
37  
38  
39  
40  
41  
42  
43  
44  
45  
46  
47  
48  
49  
50  
51  
52  
53  
54  
55  
56  
57  
58  
59  
60

opportunities to engage in risk-taking. Millions of youths wish to emulate their icons.  
It is important they recognise that substance use and risk-taking may be rooted in  
childhood adversity rather than seeing them as symbols of success.

For peer review only

### Article Focus

- Despite often considerable wealth, rock and pop stars suffer higher levels of mortality than demographically matched individuals in the general population.
- Previous studies have not considered whether such mortality risks in stars vary with the characteristics of the performer or whether cause of death may be related to experiences pre-dating fame.
- We examine whether stars still suffer excess mortality compared to matched general populations, identify which demographic and performer-type characteristics of artists affect survival and measure associations between adverse childhood experiences and cause of death.

### Key messages

- Mortality of rock and pop stars varies with demographics, nationality and other performer characteristics while cause of death is more likely to be risk-related in those who have suffered adverse childhood experiences.
- Fame increases opportunities to indulge established risk behaviours such as substance abuse. However, such risk-taking may be rooted in earlier adverse childhood experiences, the impact of which even unlimited wealth may not fully redress.
- Stars are influential figures in the development and dissemination of youth culture. A better understanding of the underlying causes of risk-taking in performers may help deglamorise such behaviour and reduce its appeal to fans and would be rock and pop stars.

### Strengths and limitations of this study

- Rock and pop stars represent a unique opportunity to examine a group sometimes with extreme wealth but often from poor or modest backgrounds.
- Although stars are typically not accessible through traditional survey techniques considerable information is available on them through biographical publications, news and other media coverage.
- The accuracy and completeness of data collated from media and biographical sources cannot be quantified. However, such limitations are unlikely to have generated the patterns identified in this study.

## INTRODUCTION

Despite their small numbers, the behaviour and health of rock and pop stars receives extensive public exposure,[1, 2] arguably exerts a disproportionate influence on population attitudes and behaviours,[3-5] and consequently requires public health examination. Within the rock and pop music industries, excessive alcohol use, recreational and prescription drug use, and other risk-taking behaviours have been described as ubiquitous.[6] International media coverage ensures that fans and the wider public are constantly informed of hedonistic displays and equally captures when prominent figures seek treatment once substance use or other behaviour has become problematic.[2] Media coverage of musicians' deaths typically suggests elevated risks of mortality at young ages and even a fanciful, but unsubstantiated, peak in deaths at age 27 years (e.g. Kurt Cobain, Amy Winehouse, Janis Joplin).[7]

Cursory examinations of rock and pop star deaths can fail to account for confounding demographics. For instance, the rock and pop star phenomenon is relatively new (largely from the 1950s) with deaths in older aged stars only now emerging. Deaths that occur in stars' later years may receive less coverage due to diminished media appeal or lower shock factor (e.g. following a long battle with cancer). Moreover, deaths at younger ages routinely occur in developed countries even in the general public (e.g. <25 years; 67,044, USA[8] and 8,126,UK[9] in 2009). These deaths are also disproportionately associated with substance use with, for instance, around one in four deaths in 16-24 year olds in England attributable to alcohol.[10] Despite such confounders, epidemiological analyses of stars reaching fame up to the beginning of this millennium showed they suffer disproportionate mortality even when controlled

1  
2  
3 for age, sex, ethnicity and nationality.[11] Such excess mortality appears, in part, to  
4  
5 be associated with risk-taking and substance use.[11]  
6  
7

8  
9  
10 The past decade has seen unprecedented changes in media exposure (e.g. celebrity  
11  
12 magazines, gossip websites) and other coverage (e.g. social networking) of  
13  
14 celebrities[12] as well as the extension and resuscitation of older stars' careers  
15  
16 through band reunions and nostalgia tours (e.g. Take That,[13] Stone Roses[14]).  
17  
18 Furthermore, a substantive population of stars and former stars over 60 years of age is  
19  
20 becoming available for comparison to the general public. Critically however, studies  
21  
22 in the general population are establishing adverse childhood experiences (ACEs) as  
23  
24 major factors influencing substance use and health outcomes in later life.[15, 16]  
25  
26 Although some rock and pop stars may seek fame as a mechanism to escape deprived  
27  
28 and abusive childhoods[17] such factors are rarely considered when examining their  
29  
30 premature mortality. Instead, substance use and risk-taking in stars are largely  
31  
32 discussed in terms of hedonism, music industry culture, responses to the pressures of  
33  
34 fame or even part of the creative process.[18]  
35  
36  
37  
38  
39

40 Here, we examine the impact of fame on mortality in North American and European  
41  
42 rock and pop stars. We update a previous epidemiological analysis[11] to include  
43  
44 more recent stars (reaching fame between 2000-2006) and incorporate larger numbers  
45  
46 of older and ex-performers. We examine risk and protective factors for mortality in  
47  
48 stars and, in particular, the role of substance use. For the first time we also explore the  
49  
50 relative contributions of ACEs and other performer characteristics to premature death  
51  
52 amongst rock and pop stars.  
53  
54  
55  
56  
57  
58  
59  
60



## METHODS

### Selecting rock and pop stars

An international poll of over 200,000 fans, experts and critics identified the all-time top 1000 albums up to the year 1999.[19] This poll was not repeated in subsequent years but an online poll-of-polls now combines >5,000 album charts from experts, fans and critics and provides annual rankings of the best albums ([www.besteveralbums.com](http://www.besteveralbums.com)). Along with the 1000 albums up to 1999, the top 30 albums each year from 2000 to 2006 were included in this study (total n=1210), with a minimum of five years fame considered necessary to calculate survival. Any solo performer or group member with an album in this list was included in the cohort (excluding compilation/soundtrack albums, n=11; Table 1). Using key websites (e.g. wikipedia.org), biographies, and published anthologies, each individual's date of birth and survival status on 20<sup>th</sup> February 2012 were identified. Based on music classifications from [www.allmusic.com](http://www.allmusic.com), those from the mainstream categories of pop/rock, punk, rap, R&B (rhythm and blues), electronica and new age were included, with individuals from the genres country, blues, jazz, vocal, celtic, folk, bluegrass and spoken word removed. Individuals for whom date of birth or nationality was unknown were also excluded along with those not of European or North American nationality (Table 1). Of the final sample (n=1489), 55.9% were from North America (NA) and 44.1% from Europe (EU). Stars were classified as solo or band artists, with a performer considered a solo artist if they had a solo album in the study.

Table 1. Sample selection: exclusions and inclusions

|                                      |                                                            | <b>n</b>    | <b>%</b>    |
|--------------------------------------|------------------------------------------------------------|-------------|-------------|
| <b>Albums</b>                        |                                                            | 1210        | 100.0       |
| Excluded                             | Compilation albums                                         | 2           | 0.2         |
|                                      | Soundtracks                                                | 9           | 0.7         |
|                                      | Additional albums by artists already included <sup>1</sup> | 279         | 22.8        |
| <b>Included</b>                      |                                                            | <b>923</b>  | <b>76.3</b> |
| <b>Individuals (from 923 albums)</b> |                                                            | 1714        | 100.0       |
| Excluded                             | Excluded genre <sup>2</sup>                                | 81          | 4.7         |
|                                      | Not from North America or Europe                           | 69          | 4.0         |
| <b>Included</b>                      |                                                            | <b>1564</b> | <b>91.3</b> |
| <b>Missing data</b>                  | No nationality and date of birth                           | 25          | 1.6         |
|                                      | No nationality                                             | 1           | 0.1         |
|                                      | No date of birth                                           | 49          | 3.1         |
| <b>Included</b>                      |                                                            | <b>1489</b> | <b>95.2</b> |

<sup>1</sup>Where additional albums included new band members such individuals were also included in the final data set.

<sup>2</sup>Country, blues, jazz, vocal, celtic, folk, bluegrass and spoken word.

### **Cause of death and adverse childhood experiences**

Date and cause of death were identified for the 137 deceased individuals. Causes of death were dichotomised into ‘substance use or risk-related deaths’ (including drug or alcohol-related chronic disorder, overdose or accident; suicide; and violence) and ‘other’. For those who had died, ACEs were identified through the same online and published biographical sources. ACEs were taken from the World Health Organization standardised ACE questionnaire[20] and here included suffering as a child: (a) physical abuse; (b) sexual abuse; (c) substantive verbal abuse; living with: (d) a depressed, mentally ill, suicidal or chronically ill person; (e) a substance-abusing household member; (f) a family with an incarcerated household member; (g) a separated family; or (h) domestic violence. Data for ACEs in each individual’s past were independently collected by two researchers (OS, KAH; concordance 97.5%) and conflicts resolved by MAB and KH.

### **Measuring point of fame**

For an objective measure of age and date of fame, we used the earliest of date of first chart success (n=1012) or date of release of earliest album included in the study (n=477). Chart success was measured as the earliest of when an individual first appeared on an album in the Top 40 UK Official Chart (n=636) or Top 40 US Billboard 200 (n=239). For those without Top 40 albums, a Top 40 single (UK chart n=27; US Billboard Hot 100, n=1) was used and, for remaining artists, the earliest Top 40 album or single in a specialist US chart (Pop, n=87; Black, n=13; Heatseekers, n=9) was used. The earliest year of fame was 1956 for Elvis Presley and the latest was 2006 for 45 individuals including Lupe Fiasco, Regina Spektor and members from bands including Arctic Monkeys and Snow Patrol.

### Calculating survival

Survival since becoming famous was calculated for comparison to expected survival based on general populations (matched to stars for sex, nationality, ethnicity, date of fame and age at fame). NA and EU stars were dominated by US and UK nationalities respectively (Table 2) and therefore US and UK national populations were used for comparisons. Analysis utilised the actuarial survival method (i.e. age standardised relative survival).[11] Individual artists were matched to corresponding annual survival probabilities experienced by average individuals (age, sex and ethnicity matched) in the general population in or near their year of fame. General population survival probabilities were taken from cohort life tables. For EU stars, we used the 2010-based UK historic cohort male and female life tables (1955–2010)[21] with population denominators retro-adjusted using the 2001 UK census and subsequent migration studies. For NA, we calculated cohort tables from the US decennial period life tables by using an offset transposition matrix.[22] For years of fame from 1955 to 1964 we applied the 1959–61 decennial tables, and so on. For the years since 2005, we applied the 2007 US annual period life tables. Race-specific US tables were calculated for whites (male and female) and blacks (male and female) (in 1959–61 decennial tables, “non-white” was used as black was not specified). In total, 14,112 sets of life tables were used to generate reference survival rates: UK males, UK females, US black males, US black females, US white males and US white females. Relative rock and pop star survival was calculated by expressing their survival as a percentage of the average of the corresponding survival probabilities from the matched reference populations. Age standardised relative survival and 95% confidence intervals (CIs) were calculated for all periods up to 20<sup>th</sup> February 2012. As 20<sup>th</sup> February 2012 was our termination date, we adjusted year of fame to run from

1  
2  
3 21<sup>st</sup> Feb to 20<sup>th</sup> Feb. Hence, Elvis Presley, whose first album was recorded in January  
4  
5 1956, was matched to the survival probabilities of the cohort of US white males aged  
6  
7 21 in 1955. Survival probabilities in the UK national life tables have no published  
8  
9 CIs and therefore differences are assumed to be significant when matched population  
10  
11 survival rates fall outside the 95% CIs for stars.  
12  
13

14  
15 Cox regression analysis was used to identify relationships between age, sex,  
16  
17 nationality, ethnicity, performer type (band or solo), age at fame and survival from  
18  
19 point of fame. Other analyses used chi squared, Mann-Whitney U tests and backwards  
20  
21 conditional logistic regression. Analyses were undertaken in Predictive Analytics  
22  
23 Software (PASW®) Version 18. Ethical approval was not required as all data were  
24  
25 accessed through publicly available materials.  
26  
27

## 28 29 **RESULTS**

30  
31 Between continents samples did not differ significantly in gender; although NA artists  
32  
33 were younger, reached fame more recently and were less likely to be white (Table 2).  
34  
35 For both continents, artists' genre was most likely to be pop/rock but the NA sample  
36  
37 had higher levels of R&B and rap; EU stars featured more in electronica.  
38  
39  
40  
41  
42  
43  
44  
45  
46  
47  
48  
49  
50  
51  
52  
53  
54  
55  
56  
57  
58  
59  
60

Table 2. Characteristics of pop star sample by geographical region

| Characteristics                                       | Total | Europe    | North America | P <sup>1</sup> |
|-------------------------------------------------------|-------|-----------|---------------|----------------|
| <b>All</b>                                            |       |           |               |                |
| Sample size (n)                                       | 1489  | 657       | 832           |                |
| Main country (%UK or US)                              | 91.1  | (UK) 87.4 | (US) 94.0     |                |
| Year of birth (median)                                | 1963  | 1961      | 1965          | 0.008          |
| Year of fame (median)                                 | 1989  | 1985      | 1992          | <0.001         |
| Male (%)                                              | 92.3  | 93.3      | 91.6          | 0.216          |
| White (%)                                             | 88.7  | 96.2      | 82.8          | <0.001         |
| Music genre (%)                                       |       |           |               |                |
| <i>Pop/rock</i>                                       | 90.7  | 93.8      | 88.2          | <0.001         |
| <i>R&amp;B</i>                                        | 2.8   | 0.5       | 4.7           | <0.001         |
| <i>Electronica</i>                                    | 2.2   | 4.6       | 0.4           | <0.001         |
| <i>New age</i>                                        | 0.3   | 0.6       | 0             | 0.024          |
| <i>Punk</i>                                           | 0.2   | 0.5       | 0             | 0.051          |
| <i>Rap</i>                                            | 3.8   | 0.2       | 6.7           | <0.001         |
| Solo artist (%)                                       | 11.1  | 7.8       | 13.7          | <0.001         |
| Died by 20/02/2012 (%)                                | 9.2   | 5.8       | 11.9          | <0.001         |
| <b>Likely cause of death (% of dead)</b>              |       |           |               |                |
| 1 <i>Chronic disorder (drug/alcohol)</i> <sup>2</sup> | 7.3   | 2.6       | 9.1           | 0.193          |
| 2 <i>Drug/alcohol overdose</i>                        | 18.2  | 26.3      | 15.2          | 0.130          |
| 3 <i>Accident (drug/alcohol related)</i>              | 5.1   | 10.5      | 3.0           | 0.074          |
| 4 <i>Suicide</i>                                      | 2.9   | 2.6       | 3.0           | 0.901          |
| 5 <i>Violence</i>                                     | 5.8   | 2.6       | 7.1           | 0.321          |
| 6 <i>Other accident</i>                               | 13.9  | 13.2      | 14.1          | 0.881          |
| 7 <i>Cardiovascular disease</i>                       | 15.3  | 10.5      | 17.2          | 0.334          |
| 8 <i>Cancer</i>                                       | 18.2  | 21.1      | 17.2          | 0.599          |
| 9 <i>Other</i>                                        | 13.9  | 10.5      | 15.2          | 0.483          |
| (1-5) <i>All substance use or risk related</i>        | 38.7  | 44.7      | 36.4          | 0.368          |

<sup>1</sup> P (probability) describes differences between North American and European rock and pop stars. Medians are compared using Mann Whitney U and percentages are compared using Chi square. <sup>2</sup>Chronic drug and alcohol disorders include liver, kidney and gastrointestinal diseases linked with substance use.

## Mortality and survival

Across the whole sample 9.2% (n=137) of rock and pop stars had died (Table 2).

Despite being younger and reaching fame more recently, more NA stars died. Median ages of death were 45.2 and 39.6 years for NA and EU stars respectively ( $Z=0.688$ ,  $P=0.492$ ). Post-fame mortality of stars differed significantly from matched general populations (Figures 1&2). For NA stars, relative survival consistently decreased from 99.3% of matched population survival one year post fame to 87.6% 40 years post fame ( $R^2=0.932$ ;  $P<0.001$ ). However, this trend was not apparent in EU stars ( $R^2=0.024$ ;  $P=0.881$ ). Here, relative survival reduced post fame (99.6% of population survival one year post fame to 97.6% 24 years post fame) while from 25 years post fame survival recovered; returning to population levels 36 years post fame.

Star survival was examined by demographic and performer-related differences within artists. Solo performers were substantively more likely to have died ( $\chi^2=20.415$ ,  $P<0.001$ ) with unadjusted mortality being approximately double that of band-member only stars both for NA (22.8%v10.2%) and EU (9.8%v5.4%; Table 3). Non-white ethnicity was associated with higher mortality while sex and age at fame were not (Table 3). Examining survival since fame while controlling for demographic confounders identified NA nationality and solo artist status as having significantly higher hazard ratios compared with being a member of a European band. Reaching fame from 1980 onwards was independently associated with a higher relative survival (Table 3).

Table 3 Crude mortality in rock and pop stars since point of fame and adjusted hazard ratios using Cox survival analysis

| Characteristics            |                     | Crude Death |        |            |        | Adjusted Hazard Ratios |         |      |       |        |       |
|----------------------------|---------------------|-------------|--------|------------|--------|------------------------|---------|------|-------|--------|-------|
| Type                       | Category            | N           | % Died | Chi Square | P      | Hazard Ratio           | 95% CIs |      | Wald  | P      |       |
| Performer type & continent | European Band       | 606         | 5.4    | 36.32      | <0.001 | Ref                    |         |      | 32.21 | <0.001 |       |
|                            | European Solo       | 51          | 9.8    |            |        | 1.12                   | 0.44    | 2.88 | 0.06  | 0.812  |       |
|                            | North American Band | 718         | 10.2   |            |        | 2.09                   | 1.39    | 3.16 | 12.36 | <0.001 |       |
|                            | North American Solo | 114         | 22.8   |            |        | 4.24                   | 2.53    | 7.09 | 30.26 | <0.001 |       |
| Ethnicity                  | Not White           | 1358        | 15.5   | 8.93       | 0.003  | Ref                    |         |      |       | 0.057  |       |
|                            | White               | 131         | 8.4    |            |        |                        |         |      |       |        |       |
| Sex                        | Female              | 114         | 7.9    | 0.25       | 0.616  | Ref                    |         |      |       | 0.416  |       |
|                            | Male                | 1375        | 9.3    |            |        |                        |         |      |       |        |       |
| Age of fame                | Under 25 yrs        | 841         | 10.8   | 3.52       | 0.061  | Ref                    |         |      |       | 0.318  |       |
|                            | 25 yrs or more      | 648         | 8.0    |            |        |                        |         |      |       |        |       |
| Year of birth              | <=1955              | 529         | 19.7   | 108.95     | <0.001 | Ref                    |         |      |       | 0.780  |       |
|                            | 1956-1969           | 509         | 4.5    |            |        |                        |         |      |       |        | 0.644 |
|                            | 1970 or later       | 451         | 2.2    |            |        |                        |         |      |       |        | 0.482 |
| Year reached Fame          | Before 1980         | 506         | 20.6   | 118.24     | <0.001 | Ref                    |         |      |       |        |       |
|                            | 1980 or later       | 983         | 3.4    |            |        |                        |         |      |       |        | 0.43  |

Ref = reference category



### Adverse childhood experiences in deceased stars

Almost half (47.2%) of stars who died from substance use or risk-related causes were reported to have had at least one ACE, compared with 25.0% of those dying through other causes ( $X^2=7.161$ ,  $P<0.01$ ). Under a third (30.8%) of deceased stars for whom no ACEs were identified died through substance use or risk-related causes, increasing to 41.9% of those with one ACE and 80.0% of those with two or more ACEs ( $X^2_{trend}=11.77$ ,  $P<0.001$ ). As 46.3% of all ACEs identified were family separations, the analysis was repeated excluding this category but remained significant ( $X^2_{trend}=7.88$ ,  $P<0.01$ ). Further, including possible confounders (performer type, continent, ethnicity, gender, age of fame, year of birth and year reached fame) in logistic regression analysis maintained the impact of increasing ACEs on cause of death (Wald=8.95,  $P<0.005$ ; AOR 2.40; 95% CIs 1.35-4.25).

### DISCUSSION

Recent studies have established the longer-term impact of rock and pop stardom on mortality; with reduced survival compared to the general population continuing well beyond the point of fame.[7, 11] However, studies have largely considered artists as a homogenous group. As well as confirming the disproportionate mortality suffered by stars overall, here we have examined the impacts of nationality and performer type (e.g. solo artist) on survival and impacts of ACEs on cause of death. Such findings raise a number of issues regarding the causes of increased mortality in stars that are central to addressing the appeal the hedonistic elements of rock and pop may have to their fan bases.

1  
2  
3  
4  
5  
6 Overall the differential between artists' mortality and that of matched individuals in  
7 the general population increased with time since fame (Figures 1&2). However, the  
8 difference in NA was substantively greater than that in EU. As previously  
9 reported,[11] for both NA and EU samples the survival gap between stars and the  
10 population widened up to 25 years post fame. At this point however, survival in EU  
11 stars only, begins recovery to general population levels. Reasons for this may include:  
12 different experiences of fame (e.g. exposure to risk factors such as drugs and  
13 protective factors including professional well-being support), longer performing  
14 careers including reunion tours, and variations in access to universal health and social  
15 care. Critically, much premature mortality is hidden from fans who may be familiar  
16 with the acute impacts of alcohol and drugs on star mortality (e.g. Amy  
17 Winehouse[23]) yet may not recognise the longer term impacts on risks of physical  
18 (e.g. cancer, heart disease) and mental health.[24, 25] Despite such links being well  
19 established even after substance use ceases,[26] they are rarely discussed when stars  
20 suffer premature mortality in middle age. Moreover, as the mortality gap between  
21 stars and the general population increases with years since fame, these longer-term  
22 effects may be of greater significance than the acute risks associated with fame  
23 (Figures 1&2). Even where substance use remains a direct contributor to premature  
24 death, the glorification of celebrity often eclipses discussion on the darker aspects of  
25 stars' lifestyles.[2, 27]

26  
27  
28  
29  
30  
31  
32  
33  
34  
35  
36  
37  
38  
39  
40  
41  
42  
43  
44  
45  
46  
47  
48  
49  
50  
51  
52  
53 Our results suggest some of the risks accredited to the rock and pop star lifestyle may  
54 in fact have more mundane roots akin to those leading to substance use and risk  
55 taking in wider populations. Recent studies have established strong relationships  
56  
57  
58  
59  
60

1  
2  
3 between ACEs, risk behavior and poor health outcomes in later life.[15, 28] For  
4  
5 instance, the US Adverse Childhood Experiences study found that adults with four or  
6  
7 more ACEs, compared to those with none, were at 7.4 times greater risk of alcohol  
8  
9 addiction, 4.7 times greater risk of illicit drug use, and 12.2 times greater risk of  
10  
11 attempted suicide.[28] Critically, risks of cancer were 1.9 times and heart disease 2.2  
12  
13 times greater as well.[28] Adverse childhoods have also been associated with  
14  
15 prescribed psychotropic medication use,[29] as well as personality disorders in early  
16  
17 adulthood,[30] which have been linked to seeking fame.[31]  
18  
19  
20  
21  
22

23 Although our data collection had significant limitations it still identified a relationship  
24  
25 between rock and pop star ACEs and their cause of death. Pursuing a career as a rock  
26  
27 or pop musician may itself be a risky strategy and one attractive to those escaping  
28  
29 from abusive, dysfunctional or deprived childhoods. Consequently, an industry with a  
30  
31 concentration of individuals having acute and long-term health risks is perhaps not  
32  
33 unexpected. However, consideration of childhood experiences brings into question  
34  
35 whether even almost limitless resources in adulthood can undo the impacts of adverse  
36  
37 childhoods,[32] or whether such resource can feed predispositions to risk behaviours.  
38  
39 Further, it highlights the importance of identifying and protecting vulnerable  
40  
41 individuals who may be attempting to achieve fame. Pop stars are among the most  
42  
43 common role models for children[33] and surveys suggest that growing numbers are  
44  
45 aspiring to pop stardom.[34] A proliferation of TV talent shows (e.g. X Factor) and  
46  
47 new opportunities created by the internet can make this dream appear more  
48  
49 achievable than ever. Moreover, a growing body of research is linking celebrity  
50  
51 worship and attachment to deficits in individuals' lives, such as family breakdown,  
52  
53 low emotional support, social isolation and poor mental health.[2,35, 36] Thus,  
54  
55  
56  
57  
58  
59  
60

1  
2  
3 vulnerable populations may be more likely both to develop strong attachments to rock  
4 and pop stars, and to emulate their health-damaging behaviours.[2]  
5  
6  
7

8  
9  
10 The influence of rock and pop stars on the wider population should not be  
11 underestimated. The pop star Lady Gaga alone has over 20 million followers on  
12 Twitter[37] and the tragic death of Whitney Houston generated over 2.5 million  
13 tweets within two hours.[38] While pop stars have had vast fan bases for decades, in  
14 recent years this relationship has moved from passive to active with stars now able to  
15 interact directly with fans through social media; increasing feelings of connectedness  
16 and arguably their influence. While stars may contribute to positive messages about  
17 youth behaviour and raise awareness of health causes (e.g. domestic violence[39])  
18 many remain icons for risk taking including drug use and alcohol misuse. For alcohol,  
19 glamorous associations with fame can be exploited by both alcohol and music  
20 companies through sponsorship and even brand placement in lyrics.[40]  
21  
22  
23  
24  
25  
26  
27  
28  
29  
30  
31  
32  
33  
34  
35

36 Finally, we identified differences in survival depending upon whether stars had  
37 pursued successful solo careers (Table 3). While this may simply be a proxy for level  
38 of fame, with solo artists often attracting more attention than for instance a drummer  
39 or keyboard player in a band, it also raises an issue of peer support. Thus, further  
40 research should address whether bands provide a mutual support mechanism that  
41 offers protective health effects.  
42  
43  
44  
45  
46  
47  
48  
49  
50

51 Inevitably any study of famous people will have limitations. Extensive internet  
52 coverage of even somewhat forgotten stars means that mortality could be relatively  
53 easily established but cause of death relied on biographical and other media coverage.  
54  
55  
56  
57  
58  
59  
60

1  
2  
3 Such methods do not provide quality assured data but equally are unlikely to have  
4  
5 generated the significant patterns identified in this study. Our definition of fame,  
6  
7 while objective, is likely to omit key individuals not included in the international polls  
8  
9 we used despite success in record sales. While other analyses have chosen artists who  
10  
11 have topped sales charts, we used a broader definition as album purchases can be  
12  
13 influenced by specific population groups. Finally, for the first time we attempted to  
14  
15 extract information from public sources on adverse experiences stars had suffered  
16  
17 while children. We limited this to those who had died as death may generate greater  
18  
19 media coverage and the exposure of more sensitive personal details. Moreover, data  
20  
21 were collected independently by two researchers and concordance between these was  
22  
23 high. However, data are inevitably incomplete and represent an initial attempt to  
24  
25 examine the impact of early life experiences in a unique group of individuals.  
26  
27  
28  
29  
30  
31

32 While such limitations are important to acknowledge, this methodology may currently  
33  
34 be the only way to study individuals who have moved, in some cases, from relative  
35  
36 poverty to extreme affluence and who have followings larger than the population of  
37  
38 entire countries. This study raises some important issues relating to protecting stars'  
39  
40 and would-be stars' acute and long-term wellbeing in an industry that has turned  
41  
42 recruitment of the next generation of stars into a global businesses. Fame inevitably  
43  
44 increases opportunities to indulge established risk behaviours but a recognition that  
45  
46 substance abuse and other risk taking, even by music icons, may be rooted in adverse  
47  
48 childhood experiences is missing from public perception.  
49  
50  
51  
52  
53

#### 54 **Acknowledgements**

56 We thank Sara Wood and Lindsay Eckley for their assistance in identifying and  
57  
58  
59  
60

1  
2  
3 collating information used in this study. We are grateful to Andrew Goodwin at Open  
4  
5 Labs for his insights into social media.  
6  
7  
8

### 9 10 **Competing interests**

11  
12 The authors have no competing interests to declare.  
13

### 14 15 16 **Funding**

17  
18 This research received no specific grant from any funding agency in the public,  
19  
20 commercial or not-for-profit sectors.  
21  
22  
23

### 24 25 **Contributors**

26  
27 MAB designed the study, directed the analyses and wrote the manuscript. KH edited  
28  
29 the manuscript and managed data collection and analysis. OS undertook data  
30  
31 collection, literature reviews and edited the manuscript. TH completed the collection  
32  
33 and analysis of actuarial data. KAH undertook data collection and edited the  
34  
35 manuscript.  
36  
37  
38

### 39 40 **Data sharing statement**

41  
42 Data sets used in this study are available from the corresponding author to those  
43  
44 wishing to undertake collaborative work on health aspects of rock and pop fame.  
45  
46  
47  
48  
49  
50  
51  
52  
53  
54  
55  
56  
57  
58  
59  
60

## Reference list

- 1 Rothman EF, Nagaswaran A, Johnson RM, *et al*. U.S. tabloid magazine coverage of a celebrity dating abuse incident: Rihanna and Chris Brown. *J Health Commun* Published Online First 4 April 2012. doi:10.1080/10810730.2011.635778.
- 2 Rojek C. Fame attack: the inflation of celebrity and its consequences. London: Bloomsbury Academic 2012.
- 3 Boden S. Dedicated followers of fashion? The influence of popular culture on children's social identities. *Media, Culture & Society* 2006;**28**:289-98.
- 4 Niederkrotenthaler T, Fu KW, Yip PS, *et al*. Changes in suicide rates following media reports on celebrity suicide: a meta-analysis. *J Epidemiol Community Health* Published Online First 21 April 2012. doi:10.1136/jech-2011-200707.
- 5 Chapman S, McLeod K, Wakefield M, *et al*. Impact of news of celebrity illness on breast cancer screening: Kylie Minogue's breast cancer diagnosis. *Med J Aust* 2005;**183**:247-50.
- 6 Shapiro H. Waiting for the man: the story of drugs and popular music. London: Helter Skelter Publishing 2003.
- 7 Wolkewitz M, Allignol A, Graves N, *et al*. Is 27 really a dangerous age for famous musicians? Retrospective cohort study. *BMJ* 2011;**343**:d7799.
- 8 Kochanek KD, Xu J, Murphy SL, *et al*. Deaths: preliminary data for 2009. *Natl Vital Stat Rep* 2011;**59**:1-51.
- 9 Office for National Statistics. Death registrations by single year of age, United Kingdom 2010. <http://www.ons.gov.uk/ons/publications/re-reference-tables.html?edition=tcm%3A77-240172>. Accessed July 2012.

- 1  
2  
3 10 Jones L, Bellis MA, Dedman D, *et al*. Alcohol-attributable fractions for England:  
4 alcohol-attributable mortality and hospital admissions. Liverpool: Centre for  
5 Public Health, Liverpool John Moores University 2008.  
6  
7  
8  
9  
10 11 Bellis MA, Hennell T, Lushey C, *et al*. Elvis to Eminem: quantifying the price of  
11 fame through early mortality of European and North American rock and pop  
12 stars. *J Epidemiol Community Health* 2007;**61**:896-901.  
13  
14  
15  
16 12 McNamara K. The paparazzi industry and new media: the evolving production  
17 and consumption of celebrity news and gossip websites. *International Journal of*  
18 *Cultural Studies* 2011;**14**:515-30.  
19  
20  
21  
22  
23 13 Roach M. Take That: now and then. London: HarperCollins Publishers 2009.  
24  
25 14 Robb J. The Stone Roses: the reunion edition. London: Random House Group  
26 Ltd 2012.  
27  
28  
29 15 Anda RF, Felitti VJ, Bremner JD, *et al*. The enduring effects of abuse and related  
30 adverse experiences in childhood. A convergence of evidence from neurobiology  
31 and epidemiology. *Eur Arch Psychiatry Clin Neuroscience* 2006;**256**:174-86.  
32  
33  
34  
35 16 Roustit C, Renahy E, Guerneq G, *et al*. Exposure to interparental violence and  
36 psychosocial maladjustment in the adult life course: advocacy for early  
37 prevention. *J Epidemiol Community Health* 2009;**63**:563-8.  
38  
39  
40  
41  
42 17 Brim OG. Look at me! The fame motive from childhood to death. Ann Arbor,  
43 MI: The University of Michigan Press 2009.  
44  
45  
46  
47 18 Napier-Bell S. Black vinyl white powder. London: Ebury Press 2002.  
48  
49  
50 19 Larkin C. All-time top 1000 albums, 3rd edition. London: Virgin Publishing  
51 2000.  
52  
53  
54 20 World Health Organization. Adverse Childhood Experiences International  
55 Questionnaire (ACE-IQ).  
56  
57  
58  
59  
60



- 1  
2  
3 [http://www.who.int/violence\\_injury\\_prevention/violence/activities/adverse\\_child](http://www.who.int/violence_injury_prevention/violence/activities/adverse_child)  
4 [hood\\_experiences/en/](http://www.who.int/violence_injury_prevention/violence/activities/adverse_child). Accessed July 2012.  
5  
6  
7  
8 21 Demographic Analysis Unit. Period and cohort life expectancy tables. Office for  
9 National Statistics 2012.  
10  
11  
12 22 Centers for Disease Control and Prevention. Life tables.  
13  
14 [http://www.cdc.gov/nchs/products/life\\_tables.htm](http://www.cdc.gov/nchs/products/life_tables.htm). Accessed July 2012.  
15  
16  
17 23 Shaw RL, Whitehead C, Giles DC. 'Crack down on the celebrity junkies': does  
18 media coverage of celebrity drug use pose a risk to young people? *Health, Risk &*  
19 *Society* 2010;**12**:575-89.  
20  
21  
22  
23 24 Rehm J, Mathers C, Popova S, *et al*. Global burden of disease and injury and  
24 economic cost attributable to alcohol use and alcohol-use disorders. *Lancet*  
25 2009;**373**:2223-33.  
26  
27  
28  
29 25 Kuepper R, van Os J, Lieb R, *et al*. Continued cannabis use and risk of incidence  
30 and persistence of psychotic symptoms: 10 year follow-up cohort study. *BMJ*  
31 2011;**342**:d738.  
32  
33  
34  
35  
36 26 Jarl J, Gerdtham U-G. Time pattern of reduction in risk of oesophageal cancer  
37 following alcohol cessation - a meta-analysis. *Addiction* 2011;**107**:1234-43.  
38  
39  
40  
41 27 Lang B. Whitney Houston's death: why the media sidestepped the lurid details.  
42 14<sup>th</sup> February 2012.  
43  
44  
45 <http://www.reuters.com/article/2012/02/14/idUS307174055220120214>. Accessed  
46 July 2012.  
47  
48  
49  
50 28 Felitti VJ, Anda RF, Nordenberg D, *et al*. Relationship of childhood abuse and  
51 household dysfunction to many of the leading causes of death in adults. The  
52 Adverse Childhood Experiences (ACE) Study. *Am J Prev Med* 1998;**14**:245-58.  
53  
54  
55  
56  
57  
58  
59  
60

- 1  
2  
3 29 Anda RF, Brown DW, Felitti VJ, *et al.* Adverse childhood experiences and  
4 prescribed psychotropic medications in adults. *Am J Prev Med* 2007;**32**:389-94.  
5  
6  
7 30 Johnson JG, Cohen P, Brown J, *et al.* Childhood maltreatment increases risk for  
8 personality disorders during early adulthood. *Arch Gen Psychiat* 1999;**56**:600-6.  
9  
10  
11 31 Pinsky D, Young M. The mirror effect: how celebrity narcissism is endangering  
12 our families - and how to stop them. New York: HarperCollins 2009.  
13  
14  
15 32 Bellis MA, Hughes K, Wood S, *et al.* National five-year examination of  
16 inequalities and trends in emergency hospital admission for violence across  
17 England. *Injury Prev* 2011;**17**:319-25.  
18  
19  
20  
21  
22 33 Read B. Britney, Beyonce, and me - primary school girls' role models and  
23 constructions of the 'popular' girl. *Gender and Education* 2010;**23**:1-13.  
24  
25  
26  
27 34 Children would rather become popstars than teachers or lawyers. The Telegraph.  
28 1st October 2009:  
29  
30 [http://www.telegraph.co.uk/education/educationnews/6250626/Children-would-](http://www.telegraph.co.uk/education/educationnews/6250626/Children-would-rather-become-popstars-than-teachers-or-lawyers.html)  
31 [rather-become-popstars-than-teachers-or-lawyers.html](http://www.telegraph.co.uk/education/educationnews/6250626/Children-would-rather-become-popstars-than-teachers-or-lawyers.html). Accessed July 2012.  
32  
33  
34  
35 35 Cheung C, Yue XD. Idol worship as compensation for parental absence. *Int J*  
36 *Adolesc Youth* 2012;**17**:35-46.  
37  
38  
39  
40 36 Maltby J, Day L, McCutcheon LE, *et al.* Personality and coping: a context for  
41 examining celebrity worship and mental health. *Br J Psychol* 2004;**95**(pt4):411-  
42 28.  
43  
44  
45  
46  
47 37 Topping A. Lady Gaga racks up 20 million Twitter followers. The Guardian. 6<sup>th</sup>  
48 March 2012. [http://www.guardian.co.uk/music/2012/mar/06/lady-gag-20-](http://www.guardian.co.uk/music/2012/mar/06/lady-gag-20-million-twitter-followers)  
49 [million-twitter-followers](http://www.guardian.co.uk/music/2012/mar/06/lady-gag-20-million-twitter-followers). Accessed July 2012.  
50  
51  
52  
53  
54  
55  
56  
57  
58  
59  
60

- 1  
2  
3 38 Nakashima R. Whitney Houston estate to gain; questions remain. The Guardian.  
4  
5 15<sup>th</sup> February 2012. <http://www.guardian.co.uk/world/feedarticle/10094205>.  
6  
7 Accessed July 2012.  
8  
9  
10 39 The United States Department of Justice. 100 celebrities "join the list" to raise  
11 awareness of violence against women. 3<sup>rd</sup> December 2009.  
12  
13 <http://blogs.justice.gov/main/archives/458>. Accessed July 2012.  
14  
15  
16 40 Primack BA, Nuzzo E, Rice KR, *et al*. Alcohol brand appearances in US popular  
17 music. *Addiction* 2011;**107**:557-66.  
18  
19  
20  
21  
22  
23  
24  
25  
26  
27  
28  
29  
30  
31  
32  
33  
34  
35  
36  
37  
38  
39  
40  
41  
42  
43  
44  
45  
46  
47  
48  
49  
50  
51  
52  
53  
54  
55  
56  
57  
58  
59  
60

**FIGURES**

Figure 1: North American and European rock and pop stars: age-standardised relative survival by years of fame. CI, confidence interval.

Footnote – Sample survival percentage is calculated by comparison of pop stars to age, sex and ethnicity matched general populations in North America and Europe for each pop star from the year they reached fame.

Figure 2: Comparative survival curves for North American and European rock and pop stars

1 Figure 1: North American and European rock and pop stars: age-standardised relative survival by years of  
 2 fame. CI, confidence interval.  
 3

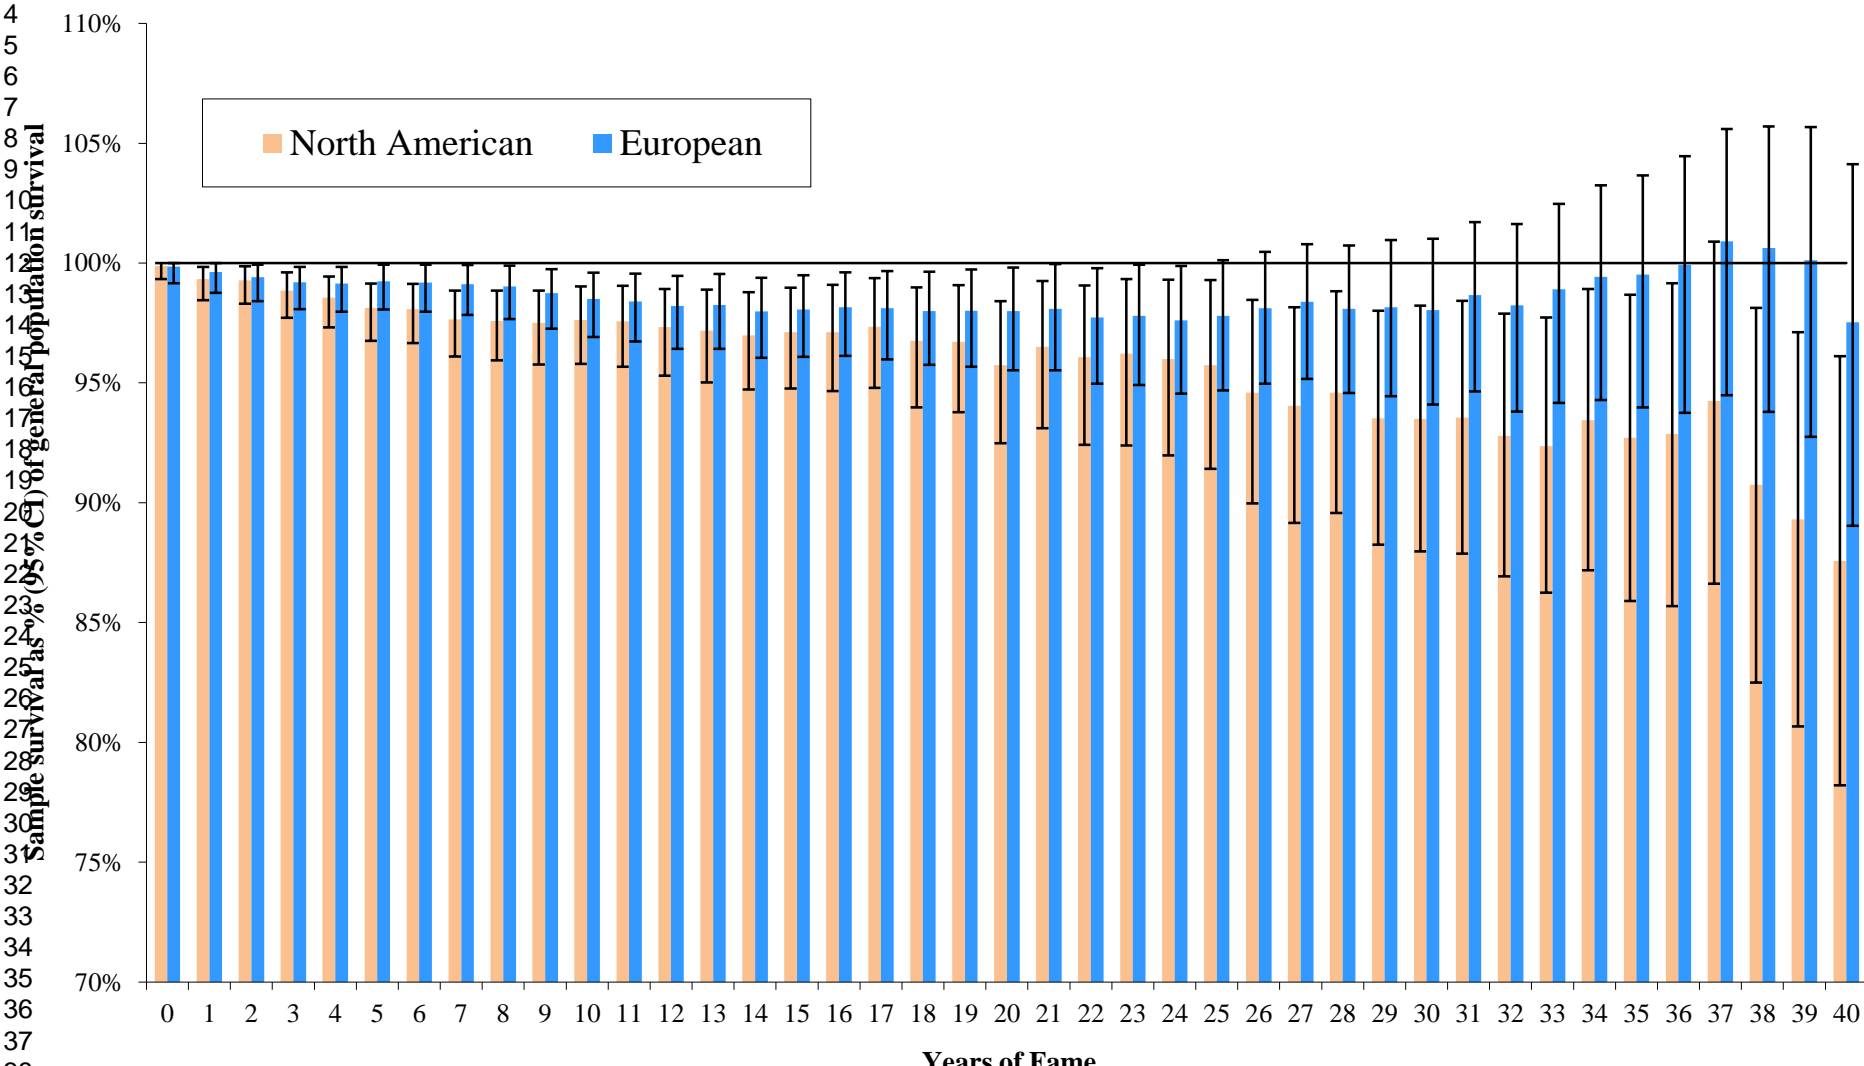

1 Figure 2: Comparative survival curves for North American and European rock and pop stars

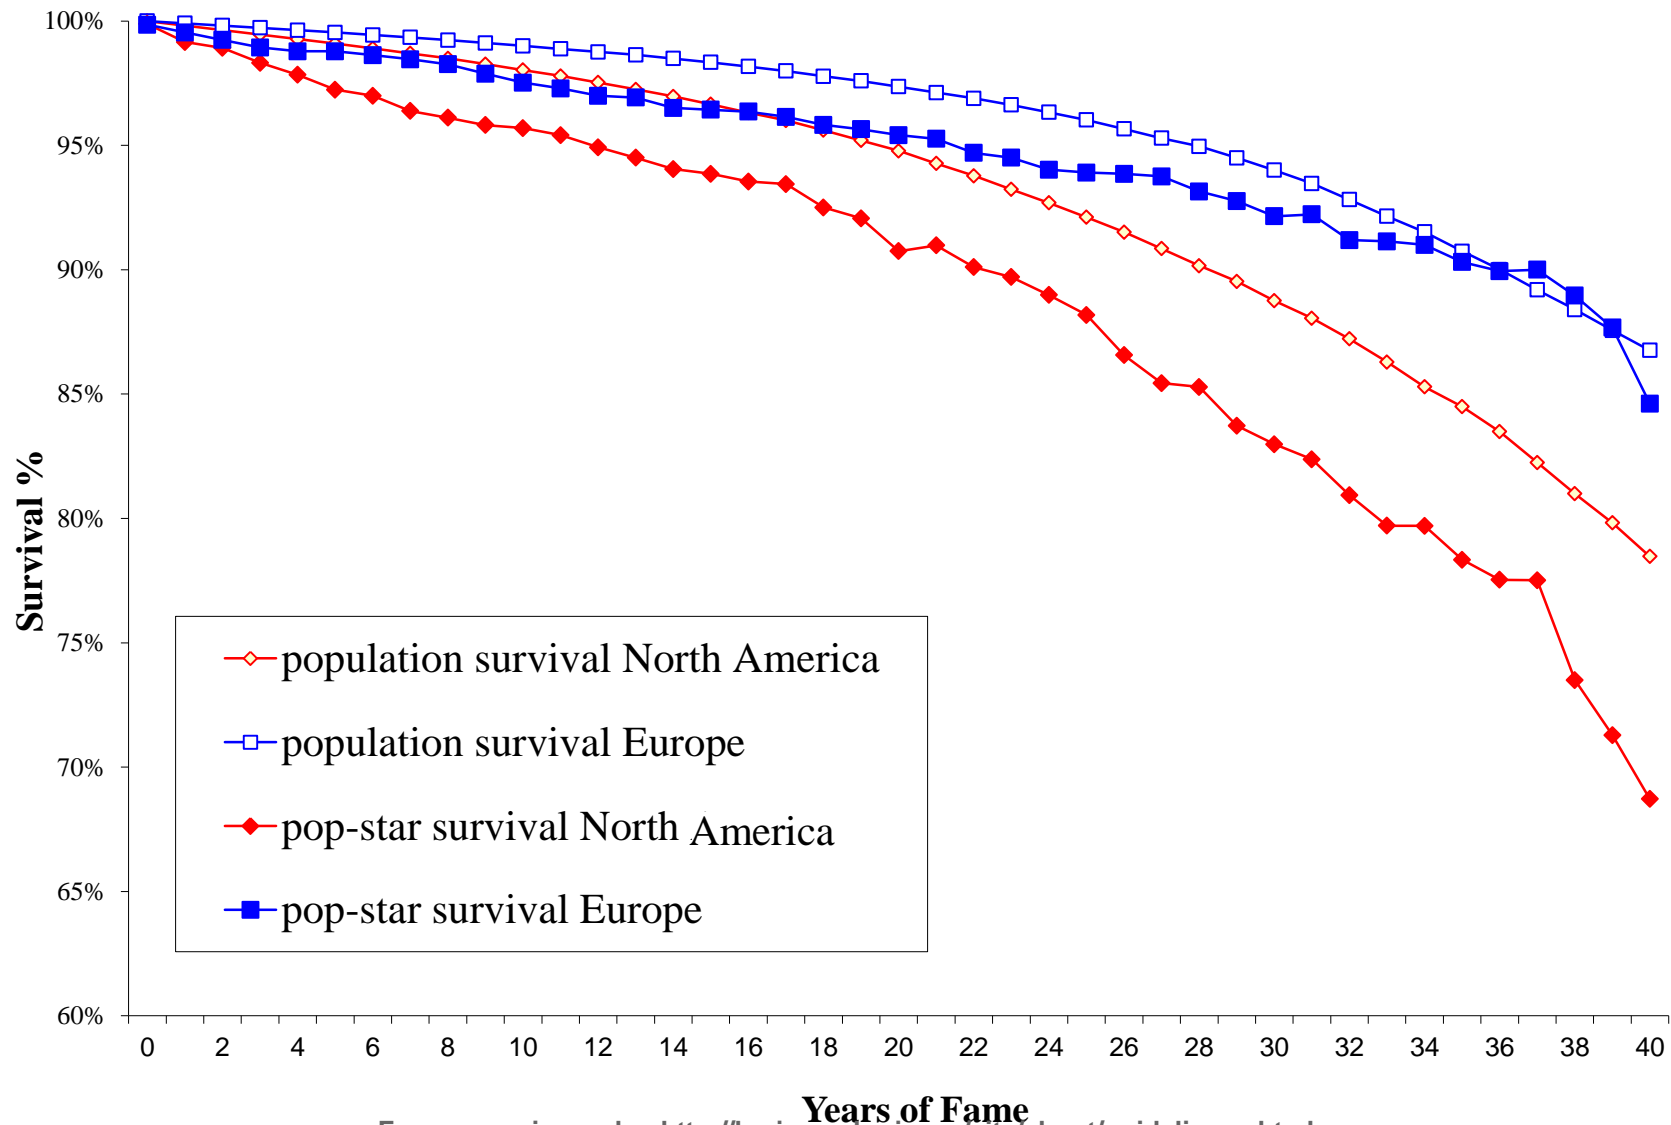

## STROBE Statement—checklist of items that should be included in reports of observational studies

|                              | Item No | Recommendation                                                                                                                                                                                                                                                                                                                                                                                                                                                         |    |
|------------------------------|---------|------------------------------------------------------------------------------------------------------------------------------------------------------------------------------------------------------------------------------------------------------------------------------------------------------------------------------------------------------------------------------------------------------------------------------------------------------------------------|----|
| <b>Title and abstract</b>    | 1       | (a) Indicate the study's design with a commonly used term in the title or the abstract                                                                                                                                                                                                                                                                                                                                                                                 | ✓  |
|                              |         | (b) Provide in the abstract an informative and balanced summary of what was done and what was found                                                                                                                                                                                                                                                                                                                                                                    | ✓  |
| <b>Introduction</b>          |         |                                                                                                                                                                                                                                                                                                                                                                                                                                                                        |    |
| Background/rationale         | 2       | Explain the scientific background and rationale for the investigation being reported                                                                                                                                                                                                                                                                                                                                                                                   | ✓  |
| Objectives                   | 3       | State specific objectives, including any prespecified hypotheses                                                                                                                                                                                                                                                                                                                                                                                                       | ✓  |
| <b>Methods</b>               |         |                                                                                                                                                                                                                                                                                                                                                                                                                                                                        |    |
| Study design                 | 4       | Present key elements of study design early in the paper                                                                                                                                                                                                                                                                                                                                                                                                                | ✓  |
| Setting                      | 5       | Describe the setting, locations, and relevant dates, including periods of recruitment, exposure, follow-up, and data collection                                                                                                                                                                                                                                                                                                                                        | ✓  |
| Participants                 | 6       | (a) <i>Cohort study</i> —Give the eligibility criteria, and the sources and methods of selection of participants. Describe methods of follow-up<br><i>Case-control study</i> —Give the eligibility criteria, and the sources and methods of case ascertainment and control selection. Give the rationale for the choice of cases and controls<br><i>Cross-sectional study</i> —Give the eligibility criteria, and the sources and methods of selection of participants | ✓  |
|                              |         | (b) <i>Cohort study</i> —For matched studies, give matching criteria and number of exposed and unexposed<br><i>Case-control study</i> —For matched studies, give matching criteria and the number of controls per case                                                                                                                                                                                                                                                 | ✓  |
| Variables                    | 7       | Clearly define all outcomes, exposures, predictors, potential confounders, and effect modifiers. Give diagnostic criteria, if applicable                                                                                                                                                                                                                                                                                                                               | ✓  |
| Data sources/<br>measurement | 8*      | For each variable of interest, give sources of data and details of methods of assessment (measurement). Describe comparability of assessment methods if there is more than one group                                                                                                                                                                                                                                                                                   | ✓  |
| Bias                         | 9       | Describe any efforts to address potential sources of bias                                                                                                                                                                                                                                                                                                                                                                                                              | ✓  |
| Study size                   | 10      | Explain how the study size was arrived at                                                                                                                                                                                                                                                                                                                                                                                                                              | ✓  |
| Quantitative variables       | 11      | Explain how quantitative variables were handled in the analyses. If applicable, describe which groupings were chosen and why                                                                                                                                                                                                                                                                                                                                           | ✓  |
| Statistical methods          | 12      | (a) Describe all statistical methods, including those used to control for confounding                                                                                                                                                                                                                                                                                                                                                                                  | ✓  |
|                              |         | (b) Describe any methods used to examine subgroups and interactions                                                                                                                                                                                                                                                                                                                                                                                                    | ✓  |
|                              |         | (c) Explain how missing data were addressed                                                                                                                                                                                                                                                                                                                                                                                                                            | ✓  |
|                              |         | (d) <i>Cohort study</i> —If applicable, explain how loss to follow-up was addressed<br><i>Case-control study</i> —If applicable, explain how matching of cases and controls was addressed<br><i>Cross-sectional study</i> —If applicable, describe analytical methods taking account of sampling strategy                                                                                                                                                              | NA |
|                              |         | (e) Describe any sensitivity analyses                                                                                                                                                                                                                                                                                                                                                                                                                                  |    |

|                          |     |                                                                                                                                                                                                              |    |
|--------------------------|-----|--------------------------------------------------------------------------------------------------------------------------------------------------------------------------------------------------------------|----|
| <b>Results</b>           |     |                                                                                                                                                                                                              |    |
| Participants             | 13* | (a) Report numbers of individuals at each stage of study—eg numbers potentially eligible, examined for eligibility, confirmed eligible, included in the study, completing follow-up, and analysed            | ✓  |
|                          |     | (b) Give reasons for non-participation at each stage                                                                                                                                                         |    |
|                          |     | (c) Consider use of a flow diagram                                                                                                                                                                           |    |
| Descriptive data         | 14* | (a) Give characteristics of study participants (eg demographic, clinical, social) and information on exposures and potential confounders                                                                     | ✓  |
|                          |     | (b) Indicate number of participants with missing data for each variable of interest                                                                                                                          | NA |
|                          |     | (c) <i>Cohort study</i> —Summarise follow-up time (eg, average and total amount)                                                                                                                             | NA |
| Outcome data             | 15* | <i>Cohort study</i> —Report numbers of outcome events or summary measures over time                                                                                                                          | ✓  |
|                          |     | <i>Case-control study</i> —Report numbers in each exposure category, or summary measures of exposure                                                                                                         |    |
|                          |     | <i>Cross-sectional study</i> —Report numbers of outcome events or summary measures                                                                                                                           |    |
| Main results             | 16  | (a) Give unadjusted estimates and, if applicable, confounder-adjusted estimates and their precision (eg, 95% confidence interval). Make clear which confounders were adjusted for and why they were included | ✓  |
|                          |     | (b) Report category boundaries when continuous variables were categorized                                                                                                                                    | ✓  |
|                          |     | (c) If relevant, consider translating estimates of relative risk into absolute risk for a meaningful time period                                                                                             | NA |
| Other analyses           | 17  | Report other analyses done—eg analyses of subgroups and interactions, and sensitivity analyses                                                                                                               | ✓  |
| <b>Discussion</b>        |     |                                                                                                                                                                                                              |    |
| Key results              | 18  | Summarise key results with reference to study objectives                                                                                                                                                     | ✓  |
| Limitations              | 19  | Discuss limitations of the study, taking into account sources of potential bias or imprecision. Discuss both direction and magnitude of any potential bias                                                   | ✓  |
| Interpretation           | 20  | Give a cautious overall interpretation of results considering objectives, limitations, multiplicity of analyses, results from similar studies, and other relevant evidence                                   | ✓  |
| Generalisability         | 21  | Discuss the generalisability (external validity) of the study results                                                                                                                                        | ✓  |
| <b>Other information</b> |     |                                                                                                                                                                                                              |    |
| Funding                  | 22  | Give the source of funding and the role of the funders for the present study and, if applicable, for the original study on which the present article is based                                                | ✓  |

\*Give information separately for cases and controls in case-control studies and, if applicable, for exposed and unexposed groups in cohort and cross-sectional studies.

**Note:** An Explanation and Elaboration article discusses each checklist item and gives methodological background and published examples of transparent reporting. The STROBE checklist is best used in conjunction with this article (freely available on the Web sites of PLoS Medicine at <http://www.plosmedicine.org/>, Annals of Internal Medicine at <http://www.annals.org/>, and Epidemiology at <http://www.epidem.com/>). Information on the STROBE Initiative is available at [www.strobe-statement.org](http://www.strobe-statement.org).





**Dying to be famous: retrospective cohort study of rock and pop star mortality and its association with adverse childhood experiences**

|                                 |                                                                                                                                                                                                                                                                                                                                                                   |
|---------------------------------|-------------------------------------------------------------------------------------------------------------------------------------------------------------------------------------------------------------------------------------------------------------------------------------------------------------------------------------------------------------------|
| Journal:                        | <i>BMJ Open</i>                                                                                                                                                                                                                                                                                                                                                   |
| Manuscript ID:                  | bmjopen-2012-002089.R1                                                                                                                                                                                                                                                                                                                                            |
| Article Type:                   | Research                                                                                                                                                                                                                                                                                                                                                          |
| Date Submitted by the Author:   | 12-Oct-2012                                                                                                                                                                                                                                                                                                                                                       |
| Complete List of Authors:       | Bellis, Mark; Liverpool John Moores, Centre for Public Health<br>Hughes, Karen; Liverpool John Moores University, Centre for Public Health<br>Sharples, Olivia; Liverpool John Moores University, Centre for Public Health<br>Hennell, Tom; Department of Health, North West<br>Hardcastle, Katherine; Liverpool John Moores University, Centre for Public Health |
| <b>Primary Subject Heading</b>: | Public health                                                                                                                                                                                                                                                                                                                                                     |
| Secondary Subject Heading:      | Addiction, Epidemiology, Occupational and environmental medicine                                                                                                                                                                                                                                                                                                  |
| Keywords:                       | PUBLIC HEALTH, EPIDEMIOLOGY, OCCUPATIONAL & INDUSTRIAL MEDICINE, Community child health < PAEDIATRICS                                                                                                                                                                                                                                                             |
|                                 |                                                                                                                                                                                                                                                                                                                                                                   |

SCHOLARONE™  
Manuscripts

1  
2  
3 **Dying to be famous: retrospective cohort study of rock and pop star mortality**  
4 **and its association with adverse childhood experiences**  
5  
6  
7  
8

9 Mark A. Bellis,<sup>1</sup> Karen Hughes,<sup>1</sup> Olivia Sharples,<sup>1</sup> Tom Hennell,<sup>2</sup> Katherine A  
10 Hardcastle<sup>1</sup>  
11  
12

13  
14  
15  
16 <sup>1</sup> Centre for Public Health, Liverpool John Moores University, 15-21 Webster Street,  
17 Liverpool, UK  
18

19  
20 <sup>2</sup> Department of Health – North West, 3 Piccadilly Place, Manchester, UK  
21  
22

23  
24 Correspondence to:  
25

26  
27 Professor Mark A Bellis, Centre for Public Health, Liverpool John Moores University,  
28 15-21 Webster Street, Liverpool L3 2ET, UK  
29  
30

31  
32  
33 Email: [m.a.bellis@ljmu.ac.uk](mailto:m.a.bellis@ljmu.ac.uk)  
34

35  
36 Telephone: +44 (0)151 231 4511  
37

38  
39 Fax: +44 (0)151 231 4552  
40  
41

42  
43  
44  
45  
46 Key words: Fame, Alcohol, Drugs, Mortality, Childhood  
47  
48

49  
50 Word count: 3292  
51  
52  
53  
54  
55  
56  
57  
58  
59  
60

## ABSTRACT

**Objectives:** Rock and pop fame is associated with risk taking, substance use and premature mortality. We examine relationships between fame and premature mortality and test how such relationships vary with type of performer (e.g. solo or band member) and nationality and whether cause of death is linked with pre-fame (adverse childhood) experiences.

**Design:** A retrospective cohort analysis based on biographical data. An actuarial methodology compares post fame mortality to matched general populations. Cox survival and logistic regression techniques examine risk and protective factors for survival and links between adverse childhood experiences and cause of death respectively.

**Setting:** North America and Europe.

**Participants:** 1489 rock and pop stars reaching fame between 1956 and 2006.

**Outcomes:** Stars' post fame mortality relative to age, sex and ethnicity matched populations (USA and UK); variations in survival with performer type, and in cause of mortality with exposure to adverse childhood experiences.

**Results:** Rock/pop star mortality increases relative to the general population with time since fame. Increases are greater in North American stars and those with solo careers. Relative mortality begins to recover 25 years after fame in European but not North American stars. Those reaching fame from 1980 onwards have better survival rates. For deceased stars, cause of death was more likely to be substance use or risk-related in those with more adverse childhood experiences.

**Conclusions:** Relationships between fame and mortality vary with performers' characteristics. Adverse experiences in early life may leave some predisposed to health-damaging behaviours, with fame and extreme wealth providing greater

1  
2  
3  
4  
5  
6  
7  
8  
9  
10  
11  
12  
13  
14  
15  
16  
17  
18  
19  
20  
21  
22  
23  
24  
25  
26  
27  
28  
29  
30  
31  
32  
33  
34  
35  
36  
37  
38  
39  
40  
41  
42  
43  
44  
45  
46  
47  
48  
49  
50  
51  
52  
53  
54  
55  
56  
57  
58  
59  
60

opportunities to engage in risk-taking. Millions of youths wish to emulate their icons.  
It is important they recognise that substance use and risk-taking may be rooted in  
childhood adversity rather than seeing them as symbols of success.

For peer review only

## Article Focus

- Despite often considerable wealth, rock and pop stars suffer higher levels of mortality than demographically matched individuals in the general population.
- Previous studies have not considered whether such mortality risks in stars vary with the characteristics of the performer or whether cause of death may be related to experiences pre-dating fame.
- We examine whether stars still suffer excess mortality compared to matched general populations, identify which demographic and performer-type characteristics of performers affect survival and measure associations between adverse childhood experiences and cause of death.

## Key messages

- Mortality of rock and pop stars varies with demographics, nationality and other performer characteristics while cause of death is more likely to be risk-related in those who have suffered adverse childhood experiences.
- Fame increases opportunities to indulge established risk behaviours such as substance abuse. However, such risk-taking may be rooted in earlier adverse childhood experiences, the impact of which even unlimited wealth may not fully redress.
- Stars are influential figures in the development and dissemination of youth culture. A better understanding of the underlying causes of risk-taking in performers may help deglamorise such behaviour and reduce its appeal to fans and would-be rock and pop stars.

### Strengths and limitations of this study

- Rock and pop stars represent a unique opportunity to examine a group sometimes with extreme wealth but often from poor or modest backgrounds.
- Although stars are typically not accessible through traditional survey techniques considerable information is available on them through biographical publications, news and other media coverage.
- The accuracy and completeness of data collated from media and biographical sources cannot be quantified. However, such limitations are unlikely to have generated the patterns identified in this study.

## INTRODUCTION

Despite their small numbers, the behaviour and health of rock and pop stars receives extensive public exposure[1, 2] and arguably exerts a disproportionate influence on population attitudes and behaviours.[3-5] Within the rock and pop music industries, excessive alcohol use, recreational and prescription drug use, and other risk-taking behaviours have been described as ubiquitous.[6] International media coverage ensures that fans and the wider public are constantly informed of stars' hedonistic displays and equally captures their consequences when behaviours become problematic and such individuals seek treatment.[2] Media coverage of rock and pop stars' deaths typically suggests elevated risks of mortality at young ages and even a fanciful, but unsubstantiated, peak in deaths at age 27 years (e.g. Kurt Cobain, Amy Winehouse, Janis Joplin).[7]

Cursory examinations of rock and pop star deaths can fail to account for confounding demographics. For instance, the rock and pop star phenomenon is relatively new (largely from the 1950s) with deaths of such stars in older age only now emerging. Deaths that occur in stars' later years may receive less coverage due to diminished media appeal or lower shock factor (e.g. following a long battle with cancer). Moreover, deaths at younger ages routinely occur in developed countries even in the general public (e.g. <25 years; 67,044 in USA[8] and 8,126 in UK[9] in 2009). These deaths are also disproportionately associated with substance use with, for instance, around one in four deaths in 16-24 year olds in England attributable to alcohol.[10] Despite such confounders, epidemiological analyses of stars reaching fame up to the beginning of this millennium showed they suffer disproportionate mortality even when controlled for age, sex, ethnicity and nationality.[11]

1  
2  
3  
4  
5 The past decade has seen unprecedented changes in global communications,  
6  
7 increasing media exposure (e.g. celebrity magazines, gossip websites) and other  
8  
9 coverage (e.g. social networking) of celebrities[12] as well as the extension and  
10  
11 resuscitation of older stars' careers through band reunions and nostalgia tours (e.g.  
12  
13 Take That,[13] Stone Roses[14]). Furthermore, substantive numbers of stars and  
14  
15 former stars over 60 years of age are only now becoming available for study.  
16  
17 Critically however, studies in the general population are establishing adverse  
18  
19 childhood experiences (ACEs) as major factors influencing substance use and health  
20  
21 outcomes in later life.[15,16] Although some rock and pop stars may seek fame as a  
22  
23 mechanism to escape deprived and abusive childhoods[17] such factors are rarely  
24  
25 considered when examining their premature mortality. Instead, substance use and  
26  
27 risk-taking in stars are largely discussed in terms of hedonism, music industry culture,  
28  
29 responses to the pressures of fame or even part of the creative process.[18]  
30  
31  
32  
33  
34  
35

36 Here, we examine the impact of fame on mortality in North American and European  
37  
38 rock and pop stars. We update a previous epidemiological analysis[11] to include  
39  
40 more recent stars (reaching fame between 2000-2006) and incorporate larger numbers  
41  
42 of older and ex-performers. We examine risk and protective factors for mortality in  
43  
44 stars. For the first time we also explore the relative contributions of ACEs and other  
45  
46 performer characteristics to cause of premature death amongst rock and pop stars.  
47  
48  
49  
50

## 51 **METHODS**

### 52 **Selecting rock and pop stars**



1  
2  
3 With no internationally agreed definition of what constitutes a rock or pop star we  
4 used large, established music polls to identify which individuals to include. An  
5 international poll of over 200,000 fans, experts and critics identified the all-time top  
6 1000 albums up to the year 1999.[19] This poll was not repeated in subsequent years  
7 but an online poll-of-polls now combines >5,000 album charts from experts, fans and  
8 critics and provides annual rankings of the best albums ([www.besteveralbums.com](http://www.besteveralbums.com)).  
9  
10 Along with the 1000 albums up to 1999, the top 30 albums each year from 2000 to  
11 2006 were included in this study (total n=1210), with a minimum of five years fame  
12 considered necessary to calculate survival. Any solo performer or group member with  
13 an album in this list was included in the cohort (excluding compilation/soundtrack  
14 albums, n=11; Table 1). Using and cross-referencing between key websites (e.g.  
15 Wikipedia, BBC Music, Last FM, All Music, official band websites), biographies, and  
16 published anthologies, each individual's date of birth and survival status on 20<sup>th</sup>  
17 February 2012 was identified. Based on music classifications from  
18 [www.allmusic.com](http://www.allmusic.com), those from the mainstream categories of pop/rock, punk, rap,  
19 R&B (rhythm and blues), electronica and new age were included. Individuals from  
20 genres typically regarded as not being mainstream in both North America and Europe  
21 (country, blues, jazz, vocal, celtic, folk, bluegrass and spoken word) were removed.  
22 Those for whom date of birth or nationality was unknown were also excluded along  
23 with anyone not of European or North American nationality (Table 1). Of the final  
24 sample (n=1489), 55.9% were from North America (NA) and 44.1% from Europe  
25 (EU). We did not distinguish different levels of fame among stars. However, they  
26 were classified as solo or band performers, with an individual considered a solo  
27 performer if they had a solo album in the study; regardless of whether this preceded or  
28 followed success as a band member (e.g. Phil Collins, Genesis; Sting, The Police).  
29  
30  
31  
32  
33  
34  
35  
36  
37  
38  
39  
40  
41  
42  
43  
44  
45  
46  
47  
48  
49  
50  
51  
52  
53  
54  
55  
56  
57  
58  
59  
60

**Table 1. Sample selection: exclusions and inclusions**

|                                      |                                                               | <b>n</b>    | <b>%</b>    |
|--------------------------------------|---------------------------------------------------------------|-------------|-------------|
| <b>Albums</b>                        |                                                               | 1210        | 100.0       |
| Excluded                             | Compilation albums                                            | 2           | 0.2         |
|                                      | Soundtracks                                                   | 9           | 0.7         |
|                                      | Additional albums by performers already included <sup>1</sup> | 279         | 22.8        |
| <b>Included</b>                      |                                                               | <b>923</b>  | <b>76.3</b> |
| <b>Individuals</b> (from 923 albums) |                                                               | 1714        | 100.0       |
| Excluded                             | Excluded genre <sup>2</sup>                                   | 81          | 4.7         |
|                                      | Not from North America or Europe                              | 69          | 4.0         |
| <b>Included</b>                      |                                                               | <b>1564</b> | <b>91.3</b> |
| <b>Missing data</b>                  | No nationality and date of birth                              | 25          | 1.6         |
|                                      | No nationality                                                | 1           | 0.1         |
|                                      | No date of birth                                              | 49          | 3.1         |
| <b>Included</b>                      |                                                               | <b>1489</b> | <b>95.2</b> |

<sup>1</sup>Where additional albums included new band members such individuals were also included in the final data set.

<sup>2</sup>Country, blues, jazz, vocal, celtic, folk, bluegrass and spoken word.

### **Cause of death and adverse childhood experiences**

Date and cause of death were identified for the 137 deceased individuals. Causes of death were dichotomised into ‘substance use or risk-related deaths’ (drug or alcohol-related chronic disorder, overdose or accident and other risk-related causes that may or may not have been related to substance use, i.e. suicide and violence) and ‘other’. For those who had died, ACEs were identified through the same online and published biographical sources. ACEs were taken from the World Health Organization standardised ACE questionnaire[20] and here included suffering as a child: (a) physical abuse; (b) sexual abuse; (c) substantive verbal abuse; living with: (d) a depressed, mentally ill, suicidal or chronically ill person; (e) a substance-abusing household member; (f) a family with an incarcerated household member; (g) a separated family; or (h) domestic violence. Data for ACEs in each individual’s past were independently collected by two researchers (OS, KAH; concordance 97.5%) and conflicts resolved by MAB and KH.

### **Measuring point of fame**

For an objective measure of age and date of fame, we used the earliest of date of first chart success (n=1012) or date of release of earliest album included in the study (n=477). Chart success was measured as the earliest of when an individual first appeared on an album in the Top 40 UK Official Chart (n=636) or Top 40 US Billboard 200 (n=239). For those without Top 40 albums, a Top 40 single (UK chart n=27; US Billboard Hot 100, n=1) was used and, for remaining performers, the earliest Top 40 album or single in a specialist US chart (Pop, n=87; Black, n=13; Heatseekers, n=9) was used. The earliest year of fame was 1956 for Elvis Presley and

1  
2  
3 the latest was 2006 for 45 individuals including Lupe Fiasco, Regina Spektor and  
4  
5 members from bands including Arctic Monkeys and Snow Patrol.  
6  
7

### 8 9 **Calculating survival**

10  
11 Survival since becoming famous was calculated for comparison to expected survival  
12  
13 based on general populations (matched to stars for sex, nationality, ethnicity, date of  
14  
15 fame and age at fame). NA and EU stars were dominated by US (94.0%) and UK  
16  
17 (87.4%) nationalities respectively and therefore US and UK national populations were  
18  
19 used for comparisons. Analysis utilised the actuarial survival method (i.e. age  
20  
21 standardised relative survival).[11] Individual performers were matched to  
22  
23 corresponding annual survival probabilities experienced by average individuals (age,  
24  
25 sex and ethnicity matched) in the general population in or near their year of fame.  
26  
27  
28  
29 General population survival probabilities were taken from cohort life tables. For EU  
30  
31 stars, we used the 2010-based UK historic cohort male and female life tables (1955–  
32  
33 2010)[21] with population denominators retro-adjusted using the 2001 UK census and  
34  
35 subsequent migration studies. For NA, we calculated cohort tables from the US  
36  
37 decennial period life tables by using an offset transposition matrix.[22] For years of  
38  
39 fame from 1955 to 1964 we applied the 1959-61 decennial tables, and so on. For the  
40  
41 years since 2005, we applied the 2007 US annual period life tables. Race-specific US  
42  
43 tables were calculated for whites (male and female) and blacks (male and female) (in  
44  
45 1959–61 decennial tables, “non-white” was used as black was not specified). In total,  
46  
47 14,112 sets of life tables were used to generate reference survival rates: UK males,  
48  
49 UK females, US black males, US black females, US white males and US white  
50  
51 females. Relative rock and pop star survival was calculated by expressing their  
52  
53 survival as a percentage of the average of the corresponding survival probabilities  
54  
55  
56  
57  
58  
59  
60

1  
2  
3 from the matched reference populations. Age standardised relative survival and 95%  
4  
5 confidence intervals (CIs) were calculated for all periods up to 20<sup>th</sup> February 2012.  
6  
7 As 20<sup>th</sup> February 2012 was our termination date, we adjusted year of fame to run from  
8  
9 21<sup>st</sup> Feb to 20<sup>th</sup> Feb. Hence, Elvis Presley, whose first album was recorded in January  
10  
11 1956, was matched to the survival probabilities of the cohort of US white males aged  
12  
13 21 in 1955. Survival probabilities in the UK national life tables have no published  
14  
15 CIs and therefore differences are assumed to be significant when matched population  
16  
17 survival rates fall outside the 95% CIs for stars.  
18  
19

20  
21  
22 Cox regression analysis was used to identify relationships between age, sex,  
23  
24 nationality, ethnicity, performer type (band or solo), age at fame and survival from  
25  
26 point of fame. Other analyses used chi squared, Mann-Whitney U tests and backwards  
27  
28 conditional logistic regression. Analyses were undertaken in Predictive Analytics  
29  
30 Software (PASW®) Version 18. Ethical approval was not required as all data were  
31  
32 accessed through publicly available materials.  
33  
34  
35

## 36 **RESULTS**

37  
38 Between continents samples did not differ significantly in gender; although NA  
39  
40 performers were younger (median year of birth; NA, 1965; EU, 1961;  $Z=2.650$ ,  
41  
42  $P<0.01$ ), reached fame more recently (median year of fame; NA, 1992; EU, 1985;  
43  
44  $Z=4.288$ ,  $P<0.001$ ) and were less likely to be white (Table 2). For both continents,  
45  
46 performers' genre was most likely to be pop/rock but the NA sample had higher  
47  
48 levels of R&B and rap; EU stars featured more in electronica.  
49  
50  
51  
52  
53  
54  
55  
56  
57  
58  
59  
60

**Table 2. Characteristics of rock and pop star sample by geographical region**

| Characteristics                                       | Total |      | Europe |      | North America |      | P <sup>1</sup> |
|-------------------------------------------------------|-------|------|--------|------|---------------|------|----------------|
|                                                       | n     | %    | n      | %    | n             | %    |                |
| All                                                   | 1489  | 100  | 657    | 100  | 832           | 100  |                |
| Male                                                  | 1375  | 92.3 | 613    | 93.3 | 762           | 91.6 | 0.216          |
| White                                                 | 1321  | 88.7 | 632    | 96.2 | 689           | 82.8 | <0.001         |
| Music genre                                           |       |      |        |      |               |      |                |
| <i>Pop/rock</i>                                       | 1350  | 90.7 | 616    | 93.8 | 734           | 88.2 | <0.001         |
| <i>R&amp;B</i>                                        | 42    | 2.8  | 3      | 0.5  | 39            | 4.7  | <0.001         |
| <i>Electronica</i>                                    | 33    | 2.2  | 30     | 4.6  | 3             | 0.4  | <0.001         |
| <i>New age</i>                                        | 4     | 0.3  | 4      | 0.6  | 0             | 0.0  | 0.024          |
| <i>Punk</i>                                           | 3     | 0.2  | 3      | 0.5  | 0             | 0.0  | 0.051          |
| <i>Rap</i>                                            | 57    | 3.8  | 1      | 0.2  | 56            | 6.7  | <0.001         |
| Solo performer                                        | 165   | 11.1 | 51     | 7.8  | 114           | 13.7 | <0.001         |
| Died by 20/02/2012                                    | 137   | 9.2  | 38     | 5.8  | 99            | 11.9 | <0.001         |
| <b>Likely cause of death (% of dead)</b>              |       |      |        |      |               |      |                |
| 1 <i>Chronic disorder (drug/alcohol)</i> <sup>2</sup> | 10    | 7.3  | 1      | 2.6  | 9             | 9.1  | 0.193          |
| 2 <i>Drug/alcohol overdose</i>                        | 25    | 18.2 | 10     | 26.3 | 15            | 15.2 | 0.130          |
| 3 <i>Accident (drug/alcohol related)</i>              | 7     | 5.1  | 4      | 10.5 | 3             | 3.0  | 0.074          |
| 4 <i>Suicide</i>                                      | 4     | 2.9  | 1      | 2.6  | 3             | 3.0  | 0.901          |
| 5 <i>Violence</i>                                     | 7     | 5.1  | 1      | 2.6  | 6             | 6.1  | 0.414          |
| 6 <i>Other accident</i>                               | 19    | 13.9 | 5      | 13.2 | 14            | 14.1 | 0.881          |
| 7 <i>Cardiovascular disease</i>                       | 21    | 15.3 | 4      | 10.5 | 17            | 17.2 | 0.334          |
| 8 <i>Cancer</i>                                       | 25    | 18.2 | 8      | 21.1 | 17            | 17.2 | 0.599          |
| 9 <i>Other</i>                                        | 18    | 13.9 | 3      | 10.5 | 15            | 15.2 | 0.483          |
| (1-5) <i>All substance use or risk related</i>        | 53    | 38.7 | 17     | 44.7 | 36            | 36.4 | 0.368          |

<sup>1</sup> P (probability) describes differences between North American and European rock and pop stars. Percentages are compared using Chi square. <sup>2</sup>Chronic drug and alcohol disorders include liver, kidney and gastrointestinal diseases linked with substance use.

### Mortality and survival

Across the whole sample 9.2% (n=137) of rock and pop stars had died (Table 2). Despite being younger and reaching fame more recently, more NA stars died. Median ages of death were 45.2 and 39.6 years for NA and EU stars respectively (Z=0.688, P=0.492). Post-fame mortality of stars differed significantly from matched general populations (Figures 1&2). For NA stars, relative survival consistently decreased

1  
2  
3 from 99.3% of matched population survival one year post fame to 87.6% 40 years  
4  
5 post fame ( $R^2=0.932$ ;  $P<0.001$ ). However, this trend was not apparent in EU stars  
6  
7 ( $R^2=0.024$ ;  $P=0.881$ ). Here, relative survival reduced post fame (99.6% of population  
8  
9 survival one year post fame to 97.6% 24 years post fame) while from 25 years post  
10  
11 fame survival recovered; returning to population levels 36 years post fame.  
12  
13

14  
15  
16 Star survival was examined by demographic and performer-related differences within  
17  
18 performers. Solo performers were substantively more likely to have died ( $X^2=20.415$ ,  
19  
20  $P<0.001$ ) with unadjusted mortality being approximately double that of band-member  
21  
22 only stars both for NA (22.8%v10.2%) and EU (9.8%v5.4%; Table 3). Non-white  
23  
24 ethnicity was associated with higher mortality while sex and age at fame were not  
25  
26 (Table 3). Examining survival since fame, while controlling for demographic  
27  
28 confounders, identified NA nationality and solo performer status as having  
29  
30 significantly higher hazard ratios compared with being a member of a European band.  
31  
32 Reaching fame from 1980 onwards was independently associated with a higher  
33  
34 relative survival (Table 3).  
35  
36  
37  
38  
39  
40  
41  
42  
43  
44  
45  
46  
47  
48  
49  
50  
51  
52  
53  
54  
55  
56  
57  
58  
59  
60

1  
2  
3  
4  
5  
6  
7  
8  
9  
10  
11  
12  
13  
14  
15  
16  
17  
18  
19  
20  
21  
22  
23  
24  
25  
26  
27  
28  
29  
30  
31  
32  
33  
34  
35  
36  
37  
38  
39  
40  
41  
42  
43  
44  
45  
46  
47  
48  
49

**Table 3 Crude mortality in rock and pop stars since point of fame and adjusted hazard ratios using Cox survival analysis**

| Characteristics            |                     | Crude Death |        |            |        | Adjusted Hazard Ratios |         |      |       |        |       |
|----------------------------|---------------------|-------------|--------|------------|--------|------------------------|---------|------|-------|--------|-------|
| Type                       | Category            | N           | % Died | Chi Square | P      | Hazard Ratio           | 95% CIs |      | Wald  | P      |       |
| Performer type & continent | European Band       | 606         | 5.4    | 36.32      | <0.001 | Ref                    |         |      | 32.21 | <0.001 |       |
|                            | European Solo       | 51          | 9.8    |            |        | 1.12                   | 0.44    | 2.88 | 0.06  | 0.812  |       |
|                            | North American Band | 718         | 10.2   |            |        | 2.09                   | 1.39    | 3.16 | 12.36 | <0.001 |       |
|                            | North American Solo | 114         | 22.8   |            |        | 4.24                   | 2.53    | 7.09 | 30.26 | <0.001 |       |
| Ethnicity                  | Not White           | 1358        | 15.5   | 8.93       | 0.003  | Ref                    |         |      |       | 0.057  |       |
|                            | White               | 131         | 8.4    |            |        |                        |         |      |       |        |       |
| Sex                        | Female              | 114         | 7.9    | 0.25       | 0.616  | Ref                    |         |      |       | 0.416  |       |
|                            | Male                | 1375        | 9.3    |            |        |                        |         |      |       |        |       |
| Age of fame                | Under 25 yrs        | 841         | 10.8   | 3.52       | 0.061  | Ref                    |         |      |       | 0.318  |       |
|                            | 25 yrs or more      | 648         | 8.0    |            |        |                        |         |      |       |        |       |
| Year of birth              | <=1955              | 529         | 19.7   | 108.95     | <0.001 | Ref                    |         |      |       | 0.780  |       |
|                            | 1956-1969           | 509         | 4.5    |            |        |                        |         |      |       |        | 0.644 |
|                            | 1970 or later       | 451         | 2.2    |            |        |                        |         |      |       |        | 0.482 |
| Year reached Fame          | Before 1980         | 506         | 20.6   | 118.24     | <0.001 | Ref                    |         |      |       |        |       |
|                            | 1980 or later       | 983         | 3.4    |            |        |                        |         |      |       |        | 0.43  |

Ref = reference category



### Adverse childhood experiences in deceased stars

Almost half (47.2%) of stars who died from substance use or risk-related causes were reported to have had at least one ACE, compared with 25.0% of those dying through other causes ( $X^2=7.161$ ,  $P<0.01$ ). Under a third (30.8%) of deceased stars for whom no ACEs were identified died through substance use or risk-related causes, increasing to 41.9% of those with one ACE and 80.0% of those with two or more ACEs ( $X^2$ trend=11.77,  $P<0.001$ ). As 46.3% of all ACEs identified were family separations, the analysis was repeated excluding this category but remained significant ( $X^2$ trend=7.88,  $P<0.01$ ). Further, including possible confounders (performer type, continent, ethnicity, gender, age of fame, year of birth and year reached fame) in logistic regression analysis maintained the impact of increasing ACEs on cause of death (Wald=8.95,  $P<0.005$ ; AOR 2.40; 95% CIs 1.35-4.25).

### DISCUSSION

Inevitably any study of famous people will have limitations. Our choice of music genres (Table 1) aimed to capture only mainstream genres across both continents but some stars of, for instance, folk, country and jazz that were not included have substantial popular followings (e.g. Damien Rice). Our definition of fame, while objective, is also likely to omit key individuals not included in the international polls we used despite success in record sales. Other analyses have chosen performers who topped sales charts [7] but we used a broader definition as specific population groups can influence album purchases. For those performers included, extensive internet coverage of even somewhat forgotten stars meant that mortality could be relatively easily established. However, exact cause of death was more difficult to identify. In

1  
2  
3 particular, for some stars deaths from accidents and longer-term conditions may have  
4  
5 been due to alcohol and drug use but would not be coded as such unless this was  
6  
7 specifically reported in biographical resources.  
8  
9

10  
11 For the first time we also attempted to extract information from public sources on  
12  
13 adverse experiences stars had suffered while children. Two researchers collected such  
14  
15 data independently and concordance between them was high. Data collection was  
16  
17 limited to those who had died as death often generates greater media coverage and  
18  
19 exposure of more sensitive personal details. However, the standard ACE tool does not  
20  
21 capture all possible adverse childhood experiences nor were all possible impacts of  
22  
23 ACEs on mortality (e.g. smoking related deaths) recorded. Moreover, the extent to  
24  
25 which ACEs occur in living pop stars and consequently their relationship with overall  
26  
27 risk of mortality is an important research questions for further work. Finally, it is  
28  
29 unknown whether the impacts of ACEs and fame in other groups (e.g. film stars,  
30  
31 sports stars) would show similar relationships with mortality to those identified here.  
32  
33 Consequently, this work on ACEs should be regarded as representing only an initial  
34  
35 attempt to examine the impact of early life experiences in a unique group of  
36  
37 individuals. However, while the limitations of this study are important to  
38  
39 acknowledge, this methodology may currently be the only way to examine individuals  
40  
41 who have moved, in some cases, from relative poverty to extreme affluence and who  
42  
43 have followings larger than the population of entire countries.  
44  
45  
46  
47  
48  
49  
50

51  
52 Consistent with our findings, other recent studies have established the longer-term  
53  
54 impact of rock and pop stardom on mortality; with reduced survival compared to the  
55  
56 general population continuing well beyond the point of fame.[7] However, studies  
57  
58  
59  
60

1  
2  
3 have largely considered performers as a homogenous group. As well as confirming  
4  
5 the disproportionate mortality suffered by stars overall, here we have examined the  
6  
7 impacts of nationality and performer type (e.g. solo performer) on survival and  
8  
9 impacts of ACEs on cause of death. Such findings raise a number of issues regarding  
10  
11 the causes of increased mortality in stars that are central to protecting the health of  
12  
13 rock and pop stars and addressing the appeal the hedonistic elements of rock and pop  
14  
15 may have to their fan bases.  
16  
17

18  
19 Overall, the differential between performers' mortality and that of matched  
20  
21 individuals in the general population increased with time since fame (Figures 1&2).  
22  
23 However, the difference in NA was substantively greater than that in EU. As  
24  
25 previously reported,[11] for both NA and EU samples the survival gap between stars  
26  
27 and the population widened up to 25 years post fame. At this point however, survival  
28  
29 in EU stars only, begins recovery to general population levels. Reasons for this may  
30  
31 include: different experiences of fame (e.g. exposure to risk factors such as drugs and  
32  
33 protective factors including professional well-being support), longer performing  
34  
35 careers including reunion tours, and variations in access to universal health and social  
36  
37 care. Critically, much premature mortality is hidden from fans who may be familiar  
38  
39 with the acute impacts of alcohol and drugs on star mortality (e.g. Amy  
40  
41 Winehouse[23]) yet may not recognise the longer term impacts on risks of physical  
42  
43 (e.g. cancer, heart disease) and mental health.[24, 25] Despite such links being well  
44  
45 established even after substance use ceases,[26] they are rarely discussed when stars  
46  
47 suffer premature mortality in middle age. Moreover, as the mortality gap between  
48  
49 stars and the general population increases with years since fame, these longer-term  
50  
51 effects may be of greater significance than the acute risks associated with fame  
52  
53 (Figures 1&2). Even where substance use remains a direct contributor to premature  
54  
55  
56  
57  
58  
59  
60

1  
2  
3 death, the glorification of celebrity often eclipses discussion on the darker aspects of  
4  
5 stars' lifestyles.[2, 27]  
6  
7

8  
9  
10 Our results suggest some of the risks accredited to the rock and pop star lifestyle may  
11  
12 in fact have more mundane roots akin to those leading to substance use and risk  
13  
14 taking in wider populations. Recent studies have established strong relationships  
15  
16 between ACEs, risk behavior and poor health outcomes in later life.[15, 28] For  
17  
18 instance, the US Adverse Childhood Experiences study found that adults with four or  
19  
20 more ACEs, compared to those with none, were at 7.4 times greater risk of alcohol  
21  
22 addiction, 4.7 times greater risk of illicit drug use, and 12.2 times greater risk of  
23  
24 attempted suicide.[28] Critically, risks of cancer were 1.9 times and heart disease 2.2  
25  
26 times greater as well.[28] Adverse childhoods have also been associated with  
27  
28 prescribed psychotropic medication use,[29] as well as personality disorders in early  
29  
30 adulthood,[30] which have been linked to seeking fame.[31] For rock and pop stars,  
31  
32 we identified a relationship between increased ACEs and risk-related causes of death.  
33  
34 Pursuing a career as a rock or pop musician may itself be a risky strategy and one  
35  
36 attractive to those escaping from abusive, dysfunctional or deprived childhoods.  
37  
38 Consequently, an industry with a concentration of individuals having acute and long-  
39  
40 term health risks is perhaps not unexpected. However, consideration of childhood  
41  
42 experiences brings into question whether even almost limitless resources in adulthood  
43  
44 can undo the impacts of adverse childhoods,[32] or whether such resource can feed  
45  
46 predispositions to risk behaviours. Rock and pop star survival also seems to relate to  
47  
48 whether they have pursued successful solo careers (Table 3). While this may simply  
49  
50 be a proxy for level of fame, with solo performers often attracting more attention than  
51  
52 for instance a drummer or keyboard player in a band, it also raises the issue of peer  
53  
54  
55  
56  
57  
58  
59  
60

1  
2  
3 support as a protective factor. Thus, further research should address whether bands  
4  
5 provide a mutual support mechanism that offers protective health effects.  
6  
7

8  
9  
10 Pop stars are among the most common role models for children[33] and surveys  
11 suggest that growing numbers are aspiring to pop stardom.[34] A proliferation of TV  
12 talent shows (e.g. X Factor) and new opportunities created by the internet can make  
13 this dream appear more achievable than ever. Moreover, a growing body of research  
14 is linking celebrity worship and attachment to deficits in individuals' lives, such as  
15 family breakdown, low emotional support, social isolation and poor mental  
16 health.[2,35, 36] Thus, vulnerable populations may be more likely both to develop  
17 strong attachments to rock and pop stars, and to emulate their health-damaging  
18 behaviours.[2]  
19  
20  
21  
22  
23  
24  
25  
26  
27  
28  
29  
30  
31

32 The impact of recent developments in how rock and pop stars influence the wider  
33 population should also not be underestimated. The pop star Lady Gaga alone has over  
34 20 million followers on Twitter[37] and the tragic death of Whitney Houston  
35 generated over 2.5 million tweets within two hours.[38] While pop stars have had vast  
36 fan bases for decades, in recent years this relationship has moved from passive to  
37 active with stars now able to interact directly with fans through social media;  
38 increasing feelings of connectedness and arguably their influence. While stars may  
39 contribute to positive messages about youth behaviour and raise awareness of health  
40 causes (e.g. domestic violence[39]) many remain icons for risk taking including drug  
41 use and alcohol misuse. For alcohol, glamorous associations with fame can be  
42 exploited by both alcohol and music companies through sponsorship and even brand  
43 placement in lyrics.[40]  
44  
45  
46  
47  
48  
49  
50  
51  
52  
53  
54  
55  
56  
57  
58  
59  
60

1  
2  
3  
4  
5 This study raises some important issues relating to protecting both stars' and would-  
6  
7 be stars' acute and long-term wellbeing in an industry that has turned recruitment of  
8  
9 the next generation of celebrities into a global businesses. Fame inevitably increases  
10  
11 opportunities to indulge established risk behaviours but a recognition that substance  
12  
13 abuse and other risk taking, even by music icons, may be rooted in adverse childhood  
14  
15 experiences is missing from public perception.  
16  
17  
18  
19

### 20 21 **Acknowledgements**

22  
23 We thank Sara Wood and Lindsay Eckley for their assistance in identifying and  
24  
25 collating information used in this study. We are grateful to Andrew Goodwin at Open  
26  
27 Labs for his insights into social media and to Professor Peter W de Leeuw and Dr  
28  
29 Adam Winstock for their reviewers' comments.  
30  
31  
32  
33

### 34 35 **Competing interests**

36  
37 The authors have no competing interests to declare.  
38  
39

### 40 41 **Funding**

42  
43 This research received no specific grant from any funding agency in the public,  
44  
45 commercial or not-for-profit sectors.  
46  
47  
48

### 49 50 **Contributors**

51  
52 MAB designed the study, directed the analyses and wrote the manuscript. KH edited  
53  
54 the manuscript and managed data collection and analysis. OS undertook data  
55  
56 collection, literature reviews and edited the manuscript. TH completed the collection  
57  
58  
59  
60

1  
2  
3 and analysis of actuarial data. KAH undertook data collection and edited the  
4  
5 manuscript.  
6  
7

### 8 9 **Data sharing statement**

10 Data sets used in this study are available from the corresponding author

11  
12  
13 ([M.A.Bellis@ljmu.ac.uk](mailto:M.A.Bellis@ljmu.ac.uk)) to those wishing to undertake collaborative work on health  
14  
15 aspects of rock and pop fame.  
16  
17  
18  
19  
20  
21  
22  
23  
24  
25  
26  
27  
28  
29  
30  
31  
32  
33  
34  
35  
36  
37  
38  
39  
40  
41  
42  
43  
44  
45  
46  
47  
48  
49  
50  
51  
52  
53  
54  
55  
56  
57  
58  
59  
60

**Reference list**

- 1 Rothman EF, Nagaswaran A, Johnson RM, *et al.* U.S. tabloid magazine coverage of a celebrity dating abuse incident: Rihanna and Chris Brown. *J Health Commun* Published Online First 4 April 2012. doi:10.1080/10810730.2011.635778.
- 2 Rojek C. Fame attack: the inflation of celebrity and its consequences. London: Bloomsbury Academic 2012.
- 3 Boden S. Dedicated followers of fashion? The influence of popular culture on children's social identities. *Media, Culture & Society* 2006;**28**:289-98.
- 4 Niederkrotenthaler T, Fu KW, Yip PS, *et al.* Changes in suicide rates following media reports on celebrity suicide: a meta-analysis. *J Epidemiol Community Health* Published Online First 21 April 2012. doi:10.1136/jech-2011-200707.
- 5 Chapman S, McLeod K, Wakefield M, *et al.* Impact of news of celebrity illness on breast cancer screening: Kylie Minogue's breast cancer diagnosis. *Med J Aust* 2005;**183**:247-50.
- 6 Shapiro H. Waiting for the man: the story of drugs and popular music. London: Helter Skelter Publishing 2003.
- 7 Wolkewitz M, Allignol A, Graves N, *et al.* Is 27 really a dangerous age for famous musicians? Retrospective cohort study. *BMJ* 2011;**343**:d7799.
- 8 Kochanek KD, Xu J, Murphy SL, *et al.* Deaths: preliminary data for 2009. *Natl Vital Stat Rep* 2011;**59**:1-51.
- 9 Office for National Statistics. Death registrations by single year of age, United Kingdom 2010. <http://www.ons.gov.uk/ons/publications/re-reference-tables.html?edition=tcm%3A77-240172>. Accessed July 2012.



- 1  
2  
3 10 Jones L, Bellis MA, Dedman D, *et al*. Alcohol-attributable fractions for England:  
4 alcohol-attributable mortality and hospital admissions. Liverpool: Centre for  
5 Public Health, Liverpool John Moores University 2008.  
6  
7  
8  
9  
10 11 Bellis MA, Hennell T, Lushey C, *et al*. Elvis to Eminem: quantifying the price of  
11 fame through early mortality of European and North American rock and pop  
12 stars. *J Epidemiol Community Health* 2007;**61**:896-901.  
13  
14  
15  
16 12 McNamara K. The paparazzi industry and new media: the evolving production  
17 and consumption of celebrity news and gossip websites. *International Journal of*  
18 *Cultural Studies* 2011;**14**:515-30.  
19  
20  
21  
22  
23 13 Roach M. Take That: now and then. London: HarperCollins Publishers 2009.  
24  
25 14 Robb J. The Stone Roses: the reunion edition. London: Random House Group  
26 Ltd 2012.  
27  
28  
29 15 Anda RF, Felitti VJ, Bremner JD, *et al*. The enduring effects of abuse and related  
30 adverse experiences in childhood. A convergence of evidence from neurobiology  
31 and epidemiology. *Eur Arch Psychiatry Clin Neuroscience* 2006;**256**:174-86.  
32  
33  
34  
35 16 Roustit C, Renahy E, Guerne G, *et al*. Exposure to interparental violence and  
36 psychosocial maladjustment in the adult life course: advocacy for early  
37 prevention. *J Epidemiol Community Health* 2009;**63**:563-8.  
38  
39  
40  
41  
42 17 Brim OG. Look at me! The fame motive from childhood to death. Ann Arbor,  
43 MI: The University of Michigan Press 2009.  
44  
45  
46  
47 18 Napier-Bell S. Black vinyl white powder. London: Ebury Press 2002.  
48  
49  
50 19 Larkin C. All-time top 1000 albums, 3rd edition. London: Virgin Publishing  
51 2000.  
52  
53  
54 20 World Health Organization. Adverse Childhood Experiences International  
55 Questionnaire (ACE-IQ).  
56  
57  
58  
59  
60

- 1  
2  
3 [http://www.who.int/violence\\_injury\\_prevention/violence/activities/adverse\\_child](http://www.who.int/violence_injury_prevention/violence/activities/adverse_child)  
4 [hood\\_experiences/en/](http://www.who.int/violence_injury_prevention/violence/activities/adverse_child). Accessed July 2012.  
5  
6  
7  
8 21 Demographic Analysis Unit. Period and cohort life expectancy tables. Office for  
9 National Statistics 2012.  
10  
11  
12 22 Centers for Disease Control and Prevention. Life tables.  
13  
14 [http://www.cdc.gov/nchs/products/life\\_tables.htm](http://www.cdc.gov/nchs/products/life_tables.htm). Accessed July 2012.  
15  
16  
17 23 Shaw RL, Whitehead C, Giles DC. 'Crack down on the celebrity junkies': does  
18 media coverage of celebrity drug use pose a risk to young people? *Health, Risk &*  
19 *Society* 2010;**12**:575-89.  
20  
21  
22  
23 24 Rehm J, Mathers C, Popova S, *et al*. Global burden of disease and injury and  
24 economic cost attributable to alcohol use and alcohol-use disorders. *Lancet*  
25 2009;**373**:2223-33.  
26  
27  
28  
29 25 Kuepper R, van Os J, Lieb R, *et al*. Continued cannabis use and risk of incidence  
30 and persistence of psychotic symptoms: 10 year follow-up cohort study. *BMJ*  
31 2011;**342**:d738.  
32  
33  
34  
35  
36 26 Jarl J, Gerdtham U-G. Time pattern of reduction in risk of oesophageal cancer  
37 following alcohol cessation - a meta-analysis. *Addiction* 2011;**107**:1234-43.  
38  
39  
40  
41 27 Lang B. Whitney Houston's death: why the media sidestepped the lurid details.  
42 14<sup>th</sup> February 2012.  
43  
44  
45 <http://www.reuters.com/article/2012/02/14/idUS307174055220120214>. Accessed  
46 July 2012.  
47  
48  
49  
50 28 Felitti VJ, Anda RF, Nordenberg D, *et al*. Relationship of childhood abuse and  
51 household dysfunction to many of the leading causes of death in adults. The  
52 Adverse Childhood Experiences (ACE) Study. *Am J Prev Med* 1998;**14**:245-58.  
53  
54  
55  
56  
57  
58  
59  
60

- 1  
2  
3 29 Anda RF, Brown DW, Felitti VJ, *et al.* Adverse childhood experiences and  
4 prescribed psychotropic medications in adults. *Am J Prev Med* 2007;**32**:389-94.  
5  
6  
7 30 Johnson JG, Cohen P, Brown J, *et al.* Childhood maltreatment increases risk for  
8 personality disorders during early adulthood. *Arch Gen Psychiat* 1999;**56**:600-6.  
9  
10  
11 31 Pinsky D, Young M. The mirror effect: how celebrity narcissism is endangering  
12 our families - and how to stop them. New York: HarperCollins 2009.  
13  
14  
15 32 Bellis MA, Hughes K, Wood S, *et al.* National five-year examination of  
16 inequalities and trends in emergency hospital admission for violence across  
17 England. *Injury Prev* 2011;**17**:319-25.  
18  
19  
20  
21 33 Read B. Britney, Beyonce, and me - primary school girls' role models and  
22 constructions of the 'popular' girl. *Gender and Education* 2010;**23**:1-13.  
23  
24  
25 34 Children would rather become popstars than teachers or lawyers. The Telegraph.  
26 1st October 2009:  
27 [http://www.telegraph.co.uk/education/educationnews/6250626/Children-would-](http://www.telegraph.co.uk/education/educationnews/6250626/Children-would-rather-become-popstars-than-teachers-or-lawyers.html)  
28 [rather-become-popstars-than-teachers-or-lawyers.html](http://www.telegraph.co.uk/education/educationnews/6250626/Children-would-rather-become-popstars-than-teachers-or-lawyers.html). Accessed July 2012.  
29  
30  
31  
32  
33  
34  
35 35 Cheung C, Yue XD. Idol worship as compensation for parental absence. *Int J*  
36 *Adolesc Youth* 2012;**17**:35-46.  
37  
38  
39  
40 36 Maltby J, Day L, McCutcheon LE, *et al.* Personality and coping: a context for  
41 examining celebrity worship and mental health. *Br J Psychol* 2004;**95**(pt4):411-  
42 28.  
43  
44  
45  
46  
47 37 Topping A. Lady Gaga racks up 20 million Twitter followers. The Guardian. 6<sup>th</sup>  
48 March 2012. [http://www.guardian.co.uk/music/2012/mar/06/lady-gag-20-](http://www.guardian.co.uk/music/2012/mar/06/lady-gag-20-million-twitter-followers)  
49 [million-twitter-followers](http://www.guardian.co.uk/music/2012/mar/06/lady-gag-20-million-twitter-followers). Accessed July 2012.  
50  
51  
52  
53  
54  
55  
56  
57  
58  
59  
60

- 1  
2  
3 38 Nakashima R. Whitney Houston estate to gain; questions remain. The Guardian.  
4  
5 15<sup>th</sup> February 2012. <http://www.guardian.co.uk/world/feedarticle/10094205>.  
6  
7 Accessed July 2012.  
8  
9  
10 39 The United States Department of Justice. 100 celebrities "join the list" to raise  
11 awareness of violence against women. 3<sup>rd</sup> December 2009.  
12  
13 <http://blogs.justice.gov/main/archives/458>. Accessed July 2012.  
14  
15  
16 40 Primack BA, Nuzzo E, Rice KR, *et al*. Alcohol brand appearances in US popular  
17 music. *Addiction* 2011;**107**:557-66.  
18  
19  
20  
21  
22  
23  
24  
25  
26  
27  
28  
29  
30  
31  
32  
33  
34  
35  
36  
37  
38  
39  
40  
41  
42  
43  
44  
45  
46  
47  
48  
49  
50  
51  
52  
53  
54  
55  
56  
57  
58  
59  
60

**FIGURES**

Figure 1: North American and European rock and pop stars: age-standardised relative survival by years of fame. CI, confidence interval.

Footnote – Sample survival percentage is calculated by comparison of rock and pop stars to age, sex and ethnicity matched general populations in North America and Europe for each star from the year they reached fame.

Figure 2: Comparative survival curves for North American and European rock and pop stars

1  
2  
3 **Dying to be famous: retrospective cohort study of rock and pop star mortality**  
4 **and its association with adverse childhood experiences**  
5  
6  
7  
8

9 Mark A. Bellis,<sup>1</sup> Karen Hughes,<sup>1</sup> Olivia Sharples,<sup>1</sup> Tom Hennell,<sup>2</sup> Katherine A  
10 Hardcastle<sup>1</sup>  
11  
12

13  
14  
15  
16 <sup>1</sup> Centre for Public Health, Liverpool John Moores University, 15-21 Webster Street,  
17 Liverpool, UK  
18

19  
20 <sup>2</sup> Department of Health – North West, 3 Piccadilly Place, Manchester, UK  
21  
22

23  
24 Correspondence to:  
25

26  
27 Professor Mark A Bellis, Centre for Public Health, Liverpool John Moores University,  
28 15-21 Webster Street, Liverpool L3 2ET, UK  
29

30  
31 Email: [m.a.bellis@ljmu.ac.uk](mailto:m.a.bellis@ljmu.ac.uk)  
32

33  
34  
35 Telephone: +44 (0)151 231 4511  
36

37  
38  
39 Fax: +44 (0)151 231 4552  
40

41  
42  
43  
44  
45  
46 Key words: Fame, Alcohol, Drugs, Mortality, Childhood  
47

48  
49  
50 Word count: 3292  
51  
52  
53  
54  
55  
56  
57  
58  
59  
60

## ABSTRACT

**Objectives:** Rock and pop fame is associated with risk taking, substance use and premature mortality. We examine relationships between fame and premature mortality and test how such relationships vary with type of performer (e.g. solo or band member) and nationality and whether cause of death is linked with pre-fame (adverse childhood) experiences.

**Design:** A retrospective cohort analysis based on biographical data. An actuarial methodology compares post fame mortality to matched general populations. Cox survival and logistic regression techniques examine risk and protective factors for survival and links between adverse childhood experiences and cause of death respectively.

**Setting:** North America and Europe.

**Participants:** 1489 rock and pop stars reaching fame between 1956 and 2006.

**Outcomes:** Stars' post fame mortality relative to age, sex and ethnicity matched populations (USA and UK); variations in survival with performer type, and in cause of mortality with exposure to adverse childhood experiences.

**Results:** Rock/pop star mortality increases relative to the general population with time since fame. Increases are greater in North American stars and those with solo careers. Relative mortality begins to recover 25 years after fame in European but not North American stars. Those reaching fame from 1980 onwards have better survival rates. For deceased stars, cause of death was more likely to be substance use or risk-related in those with more adverse childhood experiences.

**Conclusions:** Relationships between fame and mortality vary with performers' characteristics. Adverse experiences in early life may leave some predisposed to health-damaging behaviours, with fame and extreme wealth providing greater

1  
2  
3  
4  
5  
6  
7  
8  
9  
10  
11  
12  
13  
14  
15  
16  
17  
18  
19  
20  
21  
22  
23  
24  
25  
26  
27  
28  
29  
30  
31  
32  
33  
34  
35  
36  
37  
38  
39  
40  
41  
42  
43  
44  
45  
46  
47  
48  
49  
50  
51  
52  
53  
54  
55  
56  
57  
58  
59  
60

opportunities to engage in risk-taking. Millions of youths wish to emulate their icons.  
It is important they recognise that substance use and risk-taking may be rooted in  
childhood adversity rather than seeing them as symbols of success.

For peer review only



### Article Focus

- Despite often considerable wealth, rock and pop stars suffer higher levels of mortality than demographically matched individuals in the general population.
- Previous studies have not considered whether such mortality risks in stars vary with the characteristics of the performer or whether cause of death may be related to experiences pre-dating fame.
- We examine whether stars still suffer excess mortality compared to matched general populations, identify which demographic and performer-type characteristics of performers affect survival and measure associations between adverse childhood experiences and cause of death.

### Key messages

- Mortality of rock and pop stars varies with demographics, nationality and other performer characteristics while cause of death is more likely to be risk-related in those who have suffered adverse childhood experiences.
- Fame increases opportunities to indulge established risk behaviours such as substance abuse. However, such risk-taking may be rooted in earlier adverse childhood experiences, the impact of which even unlimited wealth may not fully redress.
- Stars are influential figures in the development and dissemination of youth culture. A better understanding of the underlying causes of risk-taking in performers may help deglamorise such behaviour and reduce its appeal to fans and would-be rock and pop stars.

### Strengths and limitations of this study

- Rock and pop stars represent a unique opportunity to examine a group sometimes with extreme wealth but often from poor or modest backgrounds.
- Although stars are typically not accessible through traditional survey techniques considerable information is available on them through biographical publications, news and other media coverage.
- The accuracy and completeness of data collated from media and biographical sources cannot be quantified. However, such limitations are unlikely to have generated the patterns identified in this study.

## INTRODUCTION

Despite their small numbers, the behaviour and health of rock and pop stars receives extensive public exposure[1, 2] and arguably exerts a disproportionate influence on population attitudes and behaviours.[3-5] Within the rock and pop music industries, excessive alcohol use, recreational and prescription drug use, and other risk-taking behaviours have been described as ubiquitous.[6] International media coverage ensures that fans and the wider public are constantly informed of stars' hedonistic displays and equally captures their consequences when behaviours become problematic and such individuals seek treatment.[2] Media coverage of rock and pop stars' deaths typically suggests elevated risks of mortality at young ages and even a fanciful, but unsubstantiated, peak in deaths at age 27 years (e.g. Kurt Cobain, Amy Winehouse, Janis Joplin).[7]

Cursory examinations of rock and pop star deaths can fail to account for confounding demographics. For instance, the rock and pop star phenomenon is relatively new (largely from the 1950s) with deaths of such stars in older age only now emerging. Deaths that occur in stars' later years may receive less coverage due to diminished media appeal or lower shock factor (e.g. following a long battle with cancer). Moreover, deaths at younger ages routinely occur in developed countries even in the general public (e.g. <25 years; 67,044 in USA[8] and 8,126 in UK[9] in 2009). These deaths are also disproportionately associated with substance use with, for instance, around one in four deaths in 16-24 year olds in England attributable to alcohol.[10] Despite such confounders, epidemiological analyses of stars reaching fame up to the beginning of this millennium showed they suffer disproportionate mortality even when controlled for age, sex, ethnicity and nationality.[11]

1  
2  
3  
4  
5 The past decade has seen unprecedented changes in **global communications**,  
6  
7 **increasing** media exposure (e.g. celebrity magazines, gossip websites) and other  
8  
9 coverage (e.g. social networking) of celebrities[12] as well as the extension and  
10  
11 resuscitation of older stars' careers through band reunions and nostalgia tours (e.g.  
12  
13 Take That,[13] Stone Roses[14]). Furthermore, substantive numbers of stars and  
14  
15 former stars over 60 years of age are only now becoming available for **study**.  
16  
17 Critically however, studies in the general population are establishing adverse  
18  
19 childhood experiences (ACEs) as major factors influencing substance use and health  
20  
21 outcomes in later life.[15,16] Although some rock and pop stars may seek fame as a  
22  
23 mechanism to escape deprived and abusive childhoods[17] such factors are rarely  
24  
25 considered when examining their premature mortality. Instead, substance use and  
26  
27 risk-taking in stars are largely discussed in terms of hedonism, music industry culture,  
28  
29 responses to the pressures of fame or even part of the creative process.[18]  
30  
31  
32  
33  
34  
35

36 Here, we examine the impact of fame on mortality in North American and European  
37  
38 rock and pop stars. We update a previous epidemiological analysis[11] to include  
39  
40 more recent stars (reaching fame between 2000-2006) and incorporate larger numbers  
41  
42 of older and ex-performers. We examine risk and protective factors for mortality in  
43  
44 stars. For the first time we also explore the relative contributions of ACEs and other  
45  
46 performer characteristics to cause of premature death amongst rock and pop stars.  
47  
48  
49  
50

## 51 **METHODS**

### 52 **Selecting rock and pop stars**

1  
2  
3 With no internationally agreed definition of what constitutes a rock or pop star we  
4 used large, established music polls to identify which individuals to include. An  
5 international poll of over 200,000 fans, experts and critics identified the all-time top  
6 1000 albums up to the year 1999.[19] This poll was not repeated in subsequent years  
7 but an online poll-of-polls now combines >5,000 album charts from experts, fans and  
8 critics and provides annual rankings of the best albums ([www.besteveralbums.com](http://www.besteveralbums.com)).  
9 Along with the 1000 albums up to 1999, the top 30 albums each year from 2000 to  
10 2006 were included in this study (total n=1210), with a minimum of five years fame  
11 considered necessary to calculate survival. Any solo performer or group member with  
12 an album in this list was included in the cohort (excluding compilation/soundtrack  
13 albums, n=11; Table 1). Using and cross-referencing between key websites (e.g.  
14 Wikipedia, BBC Music, Last FM, All Music, official band websites), biographies, and  
15 published anthologies, each individual's date of birth and survival status on 20<sup>th</sup>  
16 February 2012 was identified. Based on music classifications from  
17 [www.allmusic.com](http://www.allmusic.com), those from the mainstream categories of pop/rock, punk, rap,  
18 R&B (rhythm and blues), electronica and new age were included. Individuals from  
19 genres typically regarded as not being mainstream in both North America and Europe  
20 (country, blues, jazz, vocal, celtic, folk, bluegrass and spoken word) were removed.  
21 Those for whom date of birth or nationality was unknown were also excluded along  
22 with anyone not of European or North American nationality (Table 1). Of the final  
23 sample (n=1489), 55.9% were from North America (NA) and 44.1% from Europe  
24 (EU). We did not distinguish different levels of fame among stars. However, they  
25 were classified as solo or band performers, with an individual considered a solo  
26 performer if they had a solo album in the study; regardless of whether this preceded or  
27 followed success as a band member (e.g. Phil Collins, Genesis; Sting, The Police).  
28  
29  
30  
31  
32  
33  
34  
35  
36  
37  
38  
39  
40  
41  
42  
43  
44  
45  
46  
47  
48  
49  
50  
51  
52  
53  
54  
55  
56  
57  
58  
59  
60

Table 1. Sample selection: exclusions and inclusions

|                                      |                                                               | <b>n</b>    | <b>%</b>    |
|--------------------------------------|---------------------------------------------------------------|-------------|-------------|
| <b>Albums</b>                        |                                                               | 1210        | 100.0       |
| Excluded                             | Compilation albums                                            | 2           | 0.2         |
|                                      | Soundtracks                                                   | 9           | 0.7         |
|                                      | Additional albums by performers already included <sup>1</sup> | 279         | 22.8        |
| <b>Included</b>                      |                                                               | <b>923</b>  | <b>76.3</b> |
| <b>Individuals (from 923 albums)</b> |                                                               | 1714        | 100.0       |
| Excluded                             | Excluded genre <sup>2</sup>                                   | 81          | 4.7         |
|                                      | Not from North America or Europe                              | 69          | 4.0         |
| <b>Included</b>                      |                                                               | <b>1564</b> | <b>91.3</b> |
| <b>Missing data</b>                  | No nationality and date of birth                              | 25          | 1.6         |
|                                      | No nationality                                                | 1           | 0.1         |
|                                      | No date of birth                                              | 49          | 3.1         |
| <b>Included</b>                      |                                                               | <b>1489</b> | <b>95.2</b> |

<sup>1</sup>Where additional albums included new band members such individuals were also included in the final data set.

<sup>2</sup>Country, blues, jazz, vocal, celtic, folk, bluegrass and spoken word.

### Cause of death and adverse childhood experiences

Date and cause of death were identified for the 137 deceased individuals. Causes of death were dichotomised into ‘substance use or risk-related deaths’ (drug or alcohol-related chronic disorder, overdose or accident and other risk-related causes that may or may not have been related to substance use, i.e. suicide and violence) and ‘other’.

For those who had died, ACEs were identified through the same online and published biographical sources. ACEs were taken from the World Health Organization standardised ACE questionnaire[20] and here included suffering as a child: (a) physical abuse; (b) sexual abuse; (c) substantive verbal abuse; living with: (d) a depressed, mentally ill, suicidal or chronically ill person; (e) a substance-abusing household member; (f) a family with an incarcerated household member; (g) a separated family; or (h) domestic violence. Data for ACEs in each individual’s past were independently collected by two researchers (OS, KAH; concordance 97.5%) and conflicts resolved by MAB and KH.

### Measuring point of fame

For an objective measure of age and date of fame, we used the earliest of date of first chart success (n=1012) or date of release of earliest album included in the study (n=477). Chart success was measured as the earliest of when an individual first appeared on an album in the Top 40 UK Official Chart (n=636) or Top 40 US Billboard 200 (n=239). For those without Top 40 albums, a Top 40 single (UK chart n=27; US Billboard Hot 100, n=1) was used and, for remaining performers, the earliest Top 40 album or single in a specialist US chart (Pop, n=87; Black, n=13; Heatseekers, n=9) was used. The earliest year of fame was 1956 for Elvis Presley and

1  
2  
3 the latest was 2006 for 45 individuals including Lupe Fiasco, Regina Spektor and  
4  
5 members from bands including Arctic Monkeys and Snow Patrol.  
6  
7

### 8 9 **Calculating survival**

10  
11 Survival since becoming famous was calculated for comparison to expected survival  
12  
13 based on general populations (matched to stars for sex, nationality, ethnicity, date of  
14  
15 fame and age at fame). NA and EU stars were dominated by US (94.0%) and UK  
16  
17 (87.4%) nationalities respectively and therefore US and UK national populations were  
18  
19 used for comparisons. Analysis utilised the actuarial survival method (i.e. age  
20  
21 standardised relative survival).[11] Individual performers were matched to  
22  
23 corresponding annual survival probabilities experienced by average individuals (age,  
24  
25 sex and ethnicity matched) in the general population in or near their year of fame.  
26  
27  
28  
29 General population survival probabilities were taken from cohort life tables. For EU  
30  
31 stars, we used the 2010-based UK historic cohort male and female life tables (1955–  
32  
33 2010)[21] with population denominators retro-adjusted using the 2001 UK census and  
34  
35 subsequent migration studies. For NA, we calculated cohort tables from the US  
36  
37 decennial period life tables by using an offset transposition matrix.[22] For years of  
38  
39 fame from 1955 to 1964 we applied the 1959-61 decennial tables, and so on. For the  
40  
41 years since 2005, we applied the 2007 US annual period life tables. Race-specific US  
42  
43 tables were calculated for whites (male and female) and blacks (male and female) (in  
44  
45 1959–61 decennial tables, “non-white” was used as black was not specified). In total,  
46  
47 14,112 sets of life tables were used to generate reference survival rates: UK males,  
48  
49 UK females, US black males, US black females, US white males and US white  
50  
51 females. Relative rock and pop star survival was calculated by expressing their  
52  
53 survival as a percentage of the average of the corresponding survival probabilities  
54  
55  
56  
57  
58  
59  
60



1  
2  
3 from the matched reference populations. Age standardised relative survival and 95%  
4  
5 confidence intervals (CIs) were calculated for all periods up to 20<sup>th</sup> February 2012.

6  
7 As 20<sup>th</sup> February 2012 was our termination date, we adjusted year of fame to run from  
8  
9 21<sup>st</sup> Feb to 20<sup>th</sup> Feb. Hence, Elvis Presley, whose first album was recorded in January  
10  
11 1956, was matched to the survival probabilities of the cohort of US white males aged  
12  
13 21 in 1955. Survival probabilities in the UK national life tables have no published  
14  
15 CIs and therefore differences are assumed to be significant when matched population  
16  
17 survival rates fall outside the 95% CIs for stars.  
18  
19

20  
21  
22 Cox regression analysis was used to identify relationships between age, sex,  
23  
24 nationality, ethnicity, performer type (band or solo), age at fame and survival from  
25  
26 point of fame. Other analyses used chi squared, Mann-Whitney U tests and backwards  
27  
28 conditional logistic regression. Analyses were undertaken in Predictive Analytics  
29  
30 Software (PASW®) Version 18. Ethical approval was not required as all data were  
31  
32 accessed through publicly available materials.  
33  
34  
35

## 36 **RESULTS**

37  
38 Between continents samples did not differ significantly in gender; although NA  
39  
40 performers were younger (median year of birth; NA, 1965; EU, 1961;  $Z=2.650$ ,  
41  
42  $P<0.01$ ), reached fame more recently (median year of fame; NA, 1992; EU, 1985;  
43  
44  $Z=4.288$ ,  $P<0.001$ ) and were less likely to be white (Table 2). For both continents,  
45  
46 performers' genre was most likely to be pop/rock but the NA sample had higher  
47  
48 levels of R&B and rap; EU stars featured more in electronica.  
49  
50  
51  
52  
53  
54  
55  
56  
57  
58  
59  
60

**Table 2. Characteristics of rock and pop star sample by geographical region**

| Characteristics                                       | Total |      | Europe |      | North America |      | P <sup>1</sup> |
|-------------------------------------------------------|-------|------|--------|------|---------------|------|----------------|
|                                                       | n     | %    | n      | %    | n             | %    |                |
| All                                                   | 1489  | 100  | 657    | 100  | 832           | 100  |                |
| Male                                                  | 1375  | 92.3 | 613    | 93.3 | 762           | 91.6 | 0.216          |
| White                                                 | 1321  | 88.7 | 632    | 96.2 | 689           | 82.8 | <0.001         |
| Music genre                                           |       |      |        |      |               |      |                |
| <i>Pop/rock</i>                                       | 1350  | 90.7 | 616    | 93.8 | 734           | 88.2 | <0.001         |
| <i>R&amp;B</i>                                        | 42    | 2.8  | 3      | 0.5  | 39            | 4.7  | <0.001         |
| <i>Electronica</i>                                    | 33    | 2.2  | 30     | 4.6  | 3             | 0.4  | <0.001         |
| <i>New age</i>                                        | 4     | 0.3  | 4      | 0.6  | 0             | 0.0  | 0.024          |
| <i>Punk</i>                                           | 3     | 0.2  | 3      | 0.5  | 0             | 0.0  | 0.051          |
| <i>Rap</i>                                            | 57    | 3.8  | 1      | 0.2  | 56            | 6.7  | <0.001         |
| Solo performer                                        | 165   | 11.1 | 51     | 7.8  | 114           | 13.7 | <0.001         |
| Died by 20/02/2012                                    | 137   | 9.2  | 38     | 5.8  | 99            | 11.9 | <0.001         |
| <b>Likely cause of death (% of dead)</b>              |       |      |        |      |               |      |                |
| 1 <i>Chronic disorder (drug/alcohol)</i> <sup>2</sup> | 10    | 7.3  | 1      | 2.6  | 9             | 9.1  | 0.193          |
| 2 <i>Drug/alcohol overdose</i>                        | 25    | 18.2 | 10     | 26.3 | 15            | 15.2 | 0.130          |
| 3 <i>Accident (drug/alcohol related)</i>              | 7     | 5.1  | 4      | 10.5 | 3             | 3.0  | 0.074          |
| 4 <i>Suicide</i>                                      | 4     | 2.9  | 1      | 2.6  | 3             | 3.0  | 0.901          |
| 5 <i>Violence</i>                                     | 7     | 5.1  | 1      | 2.6  | 6             | 6.1  | 0.414          |
| 6 <i>Other accident</i>                               | 19    | 13.9 | 5      | 13.2 | 14            | 14.1 | 0.881          |
| 7 <i>Cardiovascular disease</i>                       | 21    | 15.3 | 4      | 10.5 | 17            | 17.2 | 0.334          |
| 8 <i>Cancer</i>                                       | 25    | 18.2 | 8      | 21.1 | 17            | 17.2 | 0.599          |
| 9 <i>Other</i>                                        | 18    | 13.9 | 3      | 10.5 | 15            | 15.2 | 0.483          |
| (1-5) <i>All substance use or risk related</i>        | 53    | 38.7 | 17     | 44.7 | 36            | 36.4 | 0.368          |

<sup>1</sup> P (probability) describes differences between North American and European rock and pop stars. Percentages are compared using Chi square. <sup>2</sup>Chronic drug and alcohol disorders include liver, kidney and gastrointestinal diseases linked with substance use.

### Mortality and survival

Across the whole sample 9.2% (n=137) of rock and pop stars had died (Table 2).

Despite being younger and reaching fame more recently, more NA stars died. Median ages of death were 45.2 and 39.6 years for NA and EU stars respectively (Z=0.688, P=0.492). Post-fame mortality of stars differed significantly from matched general populations (Figures 1&2). For NA stars, relative survival consistently decreased

1  
2  
3 from 99.3% of matched population survival one year post fame to 87.6% 40 years  
4  
5 post fame ( $R^2=0.932$ ;  $P<0.001$ ). However, this trend was not apparent in EU stars  
6  
7 ( $R^2=0.024$ ;  $P=0.881$ ). Here, relative survival reduced post fame (99.6% of population  
8  
9 survival one year post fame to 97.6% 24 years post fame) while from 25 years post  
10  
11 fame survival recovered; returning to population levels 36 years post fame.  
12  
13

14  
15  
16 Star survival was examined by demographic and performer-related differences within  
17  
18 performers. Solo performers were substantively more likely to have died ( $X^2=20.415$ ,  
19  
20  $P<0.001$ ) with unadjusted mortality being approximately double that of band-member  
21  
22 only stars both for NA (22.8%v10.2%) and EU (9.8%v5.4%; Table 3). Non-white  
23  
24 ethnicity was associated with higher mortality while sex and age at fame were not  
25  
26 (Table 3). Examining survival since fame, while controlling for demographic  
27  
28 confounders, identified NA nationality and solo performer status as having  
29  
30 significantly higher hazard ratios compared with being a member of a European band.  
31  
32 Reaching fame from 1980 onwards was independently associated with a higher  
33  
34 relative survival (Table 3).  
35  
36  
37  
38  
39  
40  
41  
42  
43  
44  
45  
46  
47  
48  
49  
50  
51  
52  
53  
54  
55  
56  
57  
58  
59  
60

1  
2  
3  
4  
5  
6  
7  
8  
9  
10  
11  
12  
13  
14  
15  
16  
17  
18  
19  
20  
21  
22  
23  
24  
25  
26  
27  
28  
29  
30  
31  
32  
33  
34  
35  
36  
37  
38  
39  
40  
41  
42  
43  
44  
45  
46  
47  
48  
49

**Table 3 Crude mortality in rock and pop stars since point of fame and adjusted hazard ratios using Cox survival analysis**

| Characteristics            |                     | Crude Death |        |            |        | Adjusted Hazard Ratios |         |      |       |        |       |
|----------------------------|---------------------|-------------|--------|------------|--------|------------------------|---------|------|-------|--------|-------|
| Type                       | Category            | N           | % Died | Chi Square | P      | Hazard Ratio           | 95% CIs |      | Wald  | P      |       |
| Performer type & continent | European Band       | 606         | 5.4    | 36.32      | <0.001 | Ref                    |         |      | 32.21 | <0.001 |       |
|                            | European Solo       | 51          | 9.8    |            |        | 1.12                   | 0.44    | 2.88 | 0.06  | 0.812  |       |
|                            | North American Band | 718         | 10.2   |            |        | 2.09                   | 1.39    | 3.16 | 12.36 | <0.001 |       |
|                            | North American Solo | 114         | 22.8   |            |        | 4.24                   | 2.53    | 7.09 | 30.26 | <0.001 |       |
| Ethnicity                  | Not White           | 1358        | 15.5   | 8.93       | 0.003  | Ref                    |         |      |       | 0.057  |       |
|                            | White               | 131         | 8.4    |            |        |                        |         |      |       |        |       |
| Sex                        | Female              | 114         | 7.9    | 0.25       | 0.616  | Ref                    |         |      |       | 0.416  |       |
|                            | Male                | 1375        | 9.3    |            |        |                        |         |      |       |        |       |
| Age of fame                | Under 25 yrs        | 841         | 10.8   | 3.52       | 0.061  | Ref                    |         |      |       | 0.318  |       |
|                            | 25 yrs or more      | 648         | 8.0    |            |        |                        |         |      |       |        |       |
| Year of birth              | <=1955              | 529         | 19.7   | 108.95     | <0.001 | Ref                    |         |      |       | 0.780  |       |
|                            | 1956-1969           | 509         | 4.5    |            |        |                        |         |      |       |        | 0.644 |
|                            | 1970 or later       | 451         | 2.2    |            |        |                        |         |      |       |        | 0.482 |
| Year reached Fame          | Before 1980         | 506         | 20.6   | 118.24     | <0.001 | Ref                    |         |      |       |        |       |
|                            | 1980 or later       | 983         | 3.4    |            |        |                        |         |      |       |        | 0.43  |

Ref = reference category

### Adverse childhood experiences in deceased stars

Almost half (47.2%) of stars who died from substance use or risk-related causes were reported to have had at least one ACE, compared with 25.0% of those dying through other causes ( $X^2=7.161$ ,  $P<0.01$ ). Under a third (30.8%) of deceased stars for whom no ACEs were identified died through substance use or risk-related causes, increasing to 41.9% of those with one ACE and 80.0% of those with two or more ACEs ( $X^2$ trend=11.77,  $P<0.001$ ). As 46.3% of all ACEs identified were family separations, the analysis was repeated excluding this category but remained significant ( $X^2$ trend=7.88,  $P<0.01$ ). Further, including possible confounders (performer type, continent, ethnicity, gender, age of fame, year of birth and year reached fame) in logistic regression analysis maintained the impact of increasing ACEs on cause of death (Wald=8.95,  $P<0.005$ ; AOR 2.40; 95% CIs 1.35-4.25).

### DISCUSSION

Inevitably any study of famous people will have limitations. Our choice of music genres (Table 1) aimed to capture only mainstream genres across both continents but some stars of, for instance, folk, country and jazz that were not included have substantial popular followings (e.g. Damien Rice). Our definition of fame, while objective, is also likely to omit key individuals not included in the international polls we used despite success in record sales. Other analyses have chosen performers who topped sales charts [7] but we used a broader definition as specific population groups can influence album purchases. For those performers included, extensive internet coverage of even somewhat forgotten stars meant that mortality could be relatively easily established. However, exact cause of death was more difficult to identify. In

1  
2  
3 particular, for some stars deaths from accidents and longer-term conditions may have  
4  
5 been due to alcohol and drug use but would not be coded as such unless this was  
6  
7 specifically reported in biographical resources.  
8  
9

10  
11 For the first time we also attempted to extract information from public sources on  
12  
13 adverse experiences stars had suffered while children. Two researchers collected such  
14  
15 data independently and concordance between them was high. Data collection was  
16  
17 limited to those who had died as death often generates greater media coverage and  
18  
19 exposure of more sensitive personal details. However, the standard ACE tool does not  
20  
21 capture all possible adverse childhood experiences nor were all possible impacts of  
22  
23 ACEs on mortality (e.g. smoking related deaths) recorded. Moreover, the extent to  
24  
25 which ACEs occur in living pop stars and consequently their relationship with overall  
26  
27 risk of mortality is an important research questions for further work. Finally, it is  
28  
29 unknown whether the impacts of ACEs and fame in other groups (e.g. film stars,  
30  
31 sports stars) would show similar relationships with mortality to those identified here.  
32  
33 Consequently, this work on ACEs should be regarded as representing only an initial  
34  
35 attempt to examine the impact of early life experiences in a unique group of  
36  
37 individuals. However, while the limitations of this study are important to  
38  
39 **acknowledge**, this methodology may currently be the only way to examine individuals  
40  
41 who have moved, in some cases, from relative poverty to extreme affluence and who  
42  
43 have followings larger than the population of entire countries.  
44  
45  
46  
47  
48  
49  
50

51  
52 Consistent with our findings, other recent studies have established the longer-term  
53  
54 impact of rock and pop stardom on mortality; with reduced survival compared to the  
55  
56 general population continuing well beyond the point of fame.[7] However, studies  
57  
58  
59  
60

1  
2  
3 have largely considered performers as a homogenous group. As well as confirming  
4  
5 the disproportionate mortality suffered by stars overall, here we have examined the  
6  
7 impacts of nationality and performer type (e.g. solo performer) on survival and  
8  
9 impacts of ACEs on cause of death. Such findings raise a number of issues regarding  
10  
11 the causes of increased mortality in stars that are central to **protecting the health of**  
12  
13 **rock and pop stars** and addressing the appeal the hedonistic elements of rock and pop  
14  
15 may have to their fan bases.  
16  
17

18  
19 Overall, the differential between performers' mortality and that of matched  
20  
21 individuals in the general population increased with time since fame (Figures 1&2).  
22  
23 However, the difference in NA was substantively greater than that in EU. As  
24  
25 previously reported,[11] for both NA and EU samples the survival gap between stars  
26  
27 and the population widened up to 25 years post fame. At this point however, survival  
28  
29 in EU stars only, begins recovery to general population levels. Reasons for this may  
30  
31 include: different experiences of fame (e.g. exposure to risk factors such as drugs and  
32  
33 protective factors including professional well-being support), longer performing  
34  
35 careers including reunion tours, and variations in access to universal health and social  
36  
37 care. Critically, much premature mortality is hidden from fans who may be familiar  
38  
39 with the acute impacts of alcohol and drugs on star mortality (e.g. Amy  
40  
41 Winehouse[23]) yet may not recognise the longer term impacts on risks of physical  
42  
43 (e.g. cancer, heart disease) and mental health.[24, 25] Despite such links being well  
44  
45 established even after substance use ceases,[26] they are rarely discussed when stars  
46  
47 suffer premature mortality in middle age. Moreover, as the mortality gap between  
48  
49 stars and the general population increases with years since fame, these longer-term  
50  
51 effects may be of greater significance than the acute risks associated with fame  
52  
53 (Figures 1&2). Even where substance use remains a direct contributor to premature  
54  
55  
56  
57  
58  
59  
60

1  
2  
3 death, the glorification of celebrity often eclipses discussion on the darker aspects of  
4  
5 stars' lifestyles.[2, 27]  
6  
7  
8

9  
10 Our results suggest some of the risks accredited to the rock and pop star lifestyle may  
11  
12 in fact have more mundane roots akin to those leading to substance use and risk  
13  
14 taking in wider populations. Recent studies have established strong relationships  
15  
16 between ACEs, risk behavior and poor health outcomes in later life.[15, 28] For  
17  
18 instance, the US Adverse Childhood Experiences study found that adults with four or  
19  
20 more ACEs, compared to those with none, were at 7.4 times greater risk of alcohol  
21  
22 addiction, 4.7 times greater risk of illicit drug use, and 12.2 times greater risk of  
23  
24 attempted suicide.[28] Critically, risks of cancer were 1.9 times and heart disease 2.2  
25  
26 times greater as well.[28] Adverse childhoods have also been associated with  
27  
28 prescribed psychotropic medication use,[29] as well as personality disorders in early  
29  
30 adulthood,[30] which have been linked to seeking fame.[31] For rock and pop stars,  
31  
32 we identified a relationship between increased ACEs and risk-related causes of death.  
33  
34 Pursuing a career as a rock or pop musician may itself be a risky strategy and one  
35  
36 attractive to those escaping from abusive, dysfunctional or deprived childhoods.  
37  
38 Consequently, an industry with a concentration of individuals having acute and long-  
39  
40 term health risks is perhaps not unexpected. However, consideration of childhood  
41  
42 experiences brings into question whether even almost limitless resources in adulthood  
43  
44 can undo the impacts of adverse childhoods,[32] or whether such resource can feed  
45  
46 predispositions to risk behaviours. Rock and pop star survival also seems to relate to  
47  
48 whether they have pursued successful solo careers (Table 3). While this may simply  
49  
50 be a proxy for level of fame, with solo performers often attracting more attention than  
51  
52 for instance a drummer or keyboard player in a band, it also raises the issue of peer  
53  
54  
55  
56  
57  
58  
59  
60



1  
2  
3 support as a protective factor. Thus, further research should address whether bands  
4  
5 provide a mutual support mechanism that offers protective health effects.  
6  
7

8  
9  
10 Pop stars are among the most common role models for children[33] and surveys  
11 suggest that growing numbers are aspiring to pop stardom.[34] A proliferation of TV  
12 talent shows (e.g. X Factor) and new opportunities created by the internet can make  
13 this dream appear more achievable than ever. Moreover, a growing body of research  
14 is linking celebrity worship and attachment to deficits in individuals' lives, such as  
15 family breakdown, low emotional support, social isolation and poor mental  
16 health.[2,35, 36] Thus, vulnerable populations may be more likely both to develop  
17 strong attachments to rock and pop stars, and to emulate their health-damaging  
18 behaviours.[2]  
19  
20  
21  
22  
23  
24  
25  
26  
27  
28  
29  
30  
31

32 The impact of recent developments in how rock and pop stars influence the wider  
33 population should also not be underestimated. The pop star Lady Gaga alone has over  
34 20 million followers on Twitter[37] and the tragic death of Whitney Houston  
35 generated over 2.5 million tweets within two hours.[38] While pop stars have had vast  
36 fan bases for decades, in recent years this relationship has moved from passive to  
37 active with stars now able to interact directly with fans through social media;  
38 increasing feelings of connectedness and arguably their influence. While stars may  
39 contribute to positive messages about youth behaviour and raise awareness of health  
40 causes (e.g. domestic violence[39]) many remain icons for risk taking including drug  
41 use and alcohol misuse. For alcohol, glamorous associations with fame can be  
42 exploited by both alcohol and music companies through sponsorship and even brand  
43 placement in lyrics.[40]  
44  
45  
46  
47  
48  
49  
50  
51  
52  
53  
54  
55  
56  
57  
58  
59  
60

1  
2  
3  
4  
5 This study raises some important issues relating to protecting both stars' and would-  
6  
7 be stars' acute and long-term wellbeing in an industry that has turned recruitment of  
8  
9 the next generation of celebrities into a global businesses. Fame inevitably increases  
10  
11 opportunities to indulge established risk behaviours but a recognition that substance  
12  
13 abuse and other risk taking, even by music icons, may be rooted in adverse childhood  
14  
15 experiences is missing from public perception.  
16  
17  
18  
19

### 20 21 **Acknowledgements**

22  
23 We thank Sara Wood and Lindsay Eckley for their assistance in identifying and  
24  
25 collating information used in this study. We are grateful to Andrew Goodwin at Open  
26  
27 Labs for his insights into social media and to Professor Peter W de Leeuw and Dr  
28  
29 Adam Winstock for their reviewers' comments.  
30  
31  
32  
33

### 34 35 **Competing interests**

36  
37 The authors have no competing interests to declare.  
38  
39

### 40 41 **Funding**

42  
43 This research received no specific grant from any funding agency in the public,  
44  
45 commercial or not-for-profit sectors.  
46  
47  
48

### 49 50 **Contributors**

51  
52 MAB designed the study, directed the analyses and wrote the manuscript. KH edited  
53  
54 the manuscript and managed data collection and analysis. OS undertook data  
55  
56 collection, literature reviews and edited the manuscript. TH completed the collection  
57  
58  
59  
60

1  
2  
3 and analysis of actuarial data. KAH undertook data collection and edited the  
4  
5 manuscript.  
6  
7

8  
9  
10 **Data sharing statement**

11 Data sets used in this study are available from the corresponding author to those  
12  
13 wishing to undertake collaborative work on health aspects of rock and pop fame.  
14  
15  
16  
17  
18  
19  
20  
21  
22  
23  
24  
25  
26  
27  
28  
29  
30  
31  
32  
33  
34  
35  
36  
37  
38  
39  
40  
41  
42  
43  
44  
45  
46  
47  
48  
49  
50  
51  
52  
53  
54  
55  
56  
57  
58  
59  
60

## Reference list

- 1 Rothman EF, Nagaswaran A, Johnson RM, *et al*. U.S. tabloid magazine coverage of a celebrity dating abuse incident: Rihanna and Chris Brown. *J Health Commun* Published Online First 4 April 2012. doi:10.1080/10810730.2011.635778.
- 2 Rojek C. Fame attack: the inflation of celebrity and its consequences. London: Bloomsbury Academic 2012.
- 3 Boden S. Dedicated followers of fashion? The influence of popular culture on children's social identities. *Media, Culture & Society* 2006;**28**:289-98.
- 4 Niederkrotenthaler T, Fu KW, Yip PS, *et al*. Changes in suicide rates following media reports on celebrity suicide: a meta-analysis. *J Epidemiol Community Health* Published Online First 21 April 2012. doi:10.1136/jech-2011-200707.
- 5 Chapman S, McLeod K, Wakefield M, *et al*. Impact of news of celebrity illness on breast cancer screening: Kylie Minogue's breast cancer diagnosis. *Med J Aust* 2005;**183**:247-50.
- 6 Shapiro H. Waiting for the man: the story of drugs and popular music. London: Helter Skelter Publishing 2003.
- 7 Wolkewitz M, Allignol A, Graves N, *et al*. Is 27 really a dangerous age for famous musicians? Retrospective cohort study. *BMJ* 2011;**343**:d7799.
- 8 Kochanek KD, Xu J, Murphy SL, *et al*. Deaths: preliminary data for 2009. *Natl Vital Stat Rep* 2011;**59**:1-51.
- 9 Office for National Statistics. Death registrations by single year of age, United Kingdom 2010. <http://www.ons.gov.uk/ons/publications/re-reference-tables.html?edition=tcm%3A77-240172>. Accessed July 2012.

- 1  
2  
3 10 Jones L, Bellis MA, Dedman D, *et al*. Alcohol-attributable fractions for England:  
4 alcohol-attributable mortality and hospital admissions. Liverpool: Centre for  
5 Public Health, Liverpool John Moores University 2008.  
6  
7  
8  
9  
10 11 Bellis MA, Hennell T, Lushey C, *et al*. Elvis to Eminem: quantifying the price of  
11 fame through early mortality of European and North American rock and pop  
12 stars. *J Epidemiol Community Health* 2007;**61**:896-901.  
13  
14  
15  
16 12 McNamara K. The paparazzi industry and new media: the evolving production  
17 and consumption of celebrity news and gossip websites. *International Journal of*  
18 *Cultural Studies* 2011;**14**:515-30.  
19  
20  
21  
22  
23 13 Roach M. Take That: now and then. London: HarperCollins Publishers 2009.  
24  
25 14 Robb J. The Stone Roses: the reunion edition. London: Random House Group  
26 Ltd 2012.  
27  
28  
29 15 Anda RF, Felitti VJ, Bremner JD, *et al*. The enduring effects of abuse and related  
30 adverse experiences in childhood. A convergence of evidence from neurobiology  
31 and epidemiology. *Eur Arch Psychiatry Clin Neuroscience* 2006;**256**:174-86.  
32  
33  
34  
35 16 Roustit C, Renahy E, Guerneq G, *et al*. Exposure to interparental violence and  
36 psychosocial maladjustment in the adult life course: advocacy for early  
37 prevention. *J Epidemiol Community Health* 2009;**63**:563-8.  
38  
39  
40  
41  
42 17 Brim OG. Look at me! The fame motive from childhood to death. Ann Arbor,  
43 MI: The University of Michigan Press 2009.  
44  
45  
46  
47 18 Napier-Bell S. Black vinyl white powder. London: Ebury Press 2002.  
48  
49  
50 19 Larkin C. All-time top 1000 albums, 3rd edition. London: Virgin Publishing  
51 2000.  
52  
53  
54 20 World Health Organization. Adverse Childhood Experiences International  
55 Questionnaire (ACE-IQ).  
56  
57  
58  
59  
60

- 1  
2  
3 [http://www.who.int/violence\\_injury\\_prevention/violence/activities/adverse\\_child](http://www.who.int/violence_injury_prevention/violence/activities/adverse_child)  
4  
5 [hood\\_experiences/en/](http://www.who.int/violence_injury_prevention/violence/activities/adverse_child). Accessed July 2012.  
6  
7  
8 21 Demographic Analysis Unit. Period and cohort life expectancy tables. Office for  
9  
10 National Statistics 2012.  
11  
12 22 Centers for Disease Control and Prevention. Life tables.  
13  
14 [http://www.cdc.gov/nchs/products/life\\_tables.htm](http://www.cdc.gov/nchs/products/life_tables.htm). Accessed July 2012.  
15  
16 23 Shaw RL, Whitehead C, Giles DC. 'Crack down on the celebrity junkies': does  
17  
18 media coverage of celebrity drug use pose a risk to young people? *Health, Risk &*  
19  
20 *Society* 2010;**12**:575-89.  
21  
22 24 Rehm J, Mathers C, Popova S, *et al*. Global burden of disease and injury and  
23  
24 economic cost attributable to alcohol use and alcohol-use disorders. *Lancet*  
25  
26 2009;**373**:2223-33.  
27  
28 25 Kuepper R, van Os J, Lieb R, *et al*. Continued cannabis use and risk of incidence  
29  
30 and persistence of psychotic symptoms: 10 year follow-up cohort study. *BMJ*  
31  
32 2011;**342**:d738.  
33  
34 26 Jarl J, Gerdtham U-G. Time pattern of reduction in risk of oesophageal cancer  
35  
36 following alcohol cessation - a meta-analysis. *Addiction* 2011;**107**:1234-43.  
37  
38 27 Lang B. Whitney Houston's death: why the media sidestepped the lurid details.  
39  
40 14<sup>th</sup> February 2012.  
41  
42 <http://www.reuters.com/article/2012/02/14/idUS307174055220120214>. Accessed  
43  
44 July 2012.  
45  
46 28 Felitti VJ, Anda RF, Nordenberg D, *et al*. Relationship of childhood abuse and  
47  
48 household dysfunction to many of the leading causes of death in adults. The  
49  
50 Adverse Childhood Experiences (ACE) Study. *Am J Prev Med* 1998;**14**:245-58.  
51  
52  
53  
54  
55  
56  
57  
58  
59  
60

- 1  
2  
3 29 Anda RF, Brown DW, Felitti VJ, *et al.* Adverse childhood experiences and  
4 prescribed psychotropic medications in adults. *Am J Prev Med* 2007;**32**:389-94.  
5  
6  
7 30 Johnson JG, Cohen P, Brown J, *et al.* Childhood maltreatment increases risk for  
8 personality disorders during early adulthood. *Arch Gen Psychiat* 1999;**56**:600-6.  
9  
10  
11 31 Pinsky D, Young M. The mirror effect: how celebrity narcissism is endangering  
12 our families - and how to stop them. New York: HarperCollins 2009.  
13  
14  
15 32 Bellis MA, Hughes K, Wood S, *et al.* National five-year examination of  
16 inequalities and trends in emergency hospital admission for violence across  
17 England. *Injury Prev* 2011;**17**:319-25.  
18  
19  
20  
21 33 Read B. Britney, Beyonce, and me - primary school girls' role models and  
22 constructions of the 'popular' girl. *Gender and Education* 2010;**23**:1-13.  
23  
24  
25 34 Children would rather become popstars than teachers or lawyers. The Telegraph.  
26 1st October 2009:  
27 [http://www.telegraph.co.uk/education/educationnews/6250626/Children-would-](http://www.telegraph.co.uk/education/educationnews/6250626/Children-would-rather-become-popstars-than-teachers-or-lawyers.html)  
28 [rather-become-popstars-than-teachers-or-lawyers.html](http://www.telegraph.co.uk/education/educationnews/6250626/Children-would-rather-become-popstars-than-teachers-or-lawyers.html). Accessed July 2012.  
29  
30  
31 35 Cheung C, Yue XD. Idol worship as compensation for parental absence. *Int J*  
32 *Adolesc Youth* 2012;**17**:35-46.  
33  
34  
35 36 Maltby J, Day L, McCutcheon LE, *et al.* Personality and coping: a context for  
36 examining celebrity worship and mental health. *Br J Psychol* 2004;**95**(pt4):411-  
37 28.  
38  
39  
40  
41 37 Topping A. Lady Gaga racks up 20 million Twitter followers. The Guardian. 6<sup>th</sup>  
42 March 2012. [http://www.guardian.co.uk/music/2012/mar/06/lady-gag-20-](http://www.guardian.co.uk/music/2012/mar/06/lady-gag-20-million-twitter-followers)  
43 [million-twitter-followers](http://www.guardian.co.uk/music/2012/mar/06/lady-gag-20-million-twitter-followers). Accessed July 2012.  
44  
45  
46  
47  
48  
49  
50  
51  
52  
53  
54  
55  
56  
57  
58  
59  
60

- 1  
2  
3 38 Nakashima R. Whitney Houston estate to gain; questions remain. The Guardian.  
4  
5 15<sup>th</sup> February 2012. <http://www.guardian.co.uk/world/feedarticle/10094205>.  
6  
7 Accessed July 2012.  
8  
9  
10 39 The United States Department of Justice. 100 celebrities "join the list" to raise  
11 awareness of violence against women. 3<sup>rd</sup> December 2009.  
12  
13 <http://blogs.justice.gov/main/archives/458>. Accessed July 2012.  
14  
15  
16 40 Primack BA, Nuzzo E, Rice KR, *et al*. Alcohol brand appearances in US popular  
17 music. *Addiction* 2011;**107**:557-66.  
18  
19  
20  
21  
22  
23  
24  
25  
26  
27  
28  
29  
30  
31  
32  
33  
34  
35  
36  
37  
38  
39  
40  
41  
42  
43  
44  
45  
46  
47  
48  
49  
50  
51  
52  
53  
54  
55  
56  
57  
58  
59  
60



**FIGURES**

Figure 1: North American and European rock and pop stars: age-standardised relative survival by years of fame. CI, confidence interval.

Footnote – Sample survival percentage is calculated by comparison of rock and pop stars to age, sex and ethnicity matched general populations in North America and Europe for each star from the year they reached fame.

Figure 2: Comparative survival curves for North American and European rock and pop stars

1  
2  
3  
4  
5  
6  
7  
8  
9  
10  
11  
12  
13  
14  
15  
16  
17  
18  
19  
20  
21  
22  
23  
24  
25  
26  
27  
28  
29  
30  
31  
32  
33  
34  
35  
36  
37  
38  
39  
40  
41  
42  
43  
44  
45  
46  
47  
48  
49  
50  
51  
52  
53  
54  
55  
56  
57  
58  
59  
60

Figure 1: North American and European rock and pop stars: age-standardised relative survival by years of fame. CI, confidence interval.

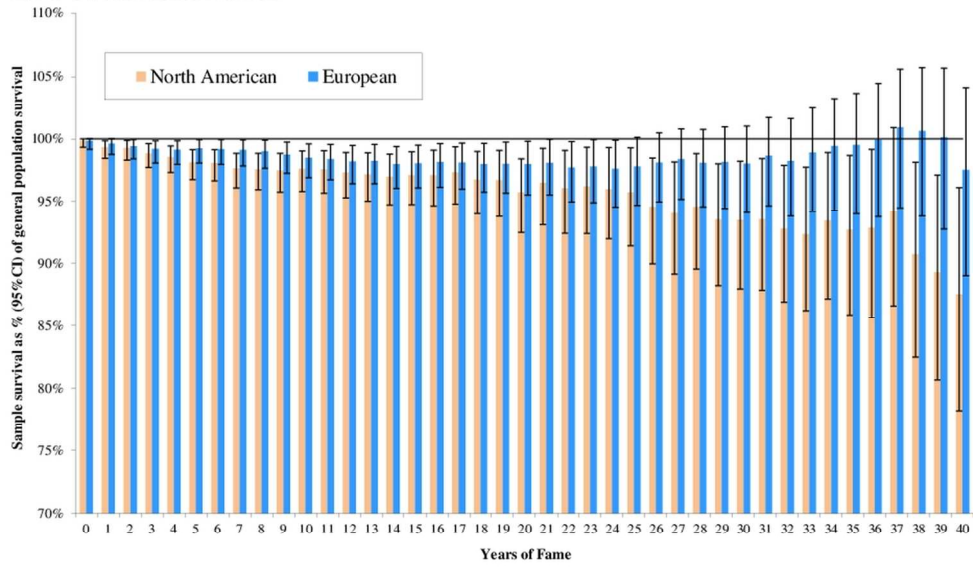

Figure 1: North American and European rock and pop stars: age-standardised relative survival by years of fame. CI, confidence interval.

119x90mm (300 x 300 DPI)

1  
2  
3  
4  
5  
6  
7  
8  
9  
10  
11  
12  
13  
14  
15  
16  
17  
18  
19  
20  
21  
22  
23  
24  
25  
26  
27  
28  
29  
30  
31  
32  
33  
34  
35  
36  
37  
38  
39  
40  
41  
42  
43  
44  
45  
46  
47  
48  
49  
50  
51  
52  
53  
54  
55  
56  
57  
58  
59  
60

Figure 2: Comparative survival curves for North American and European rock and pop stars

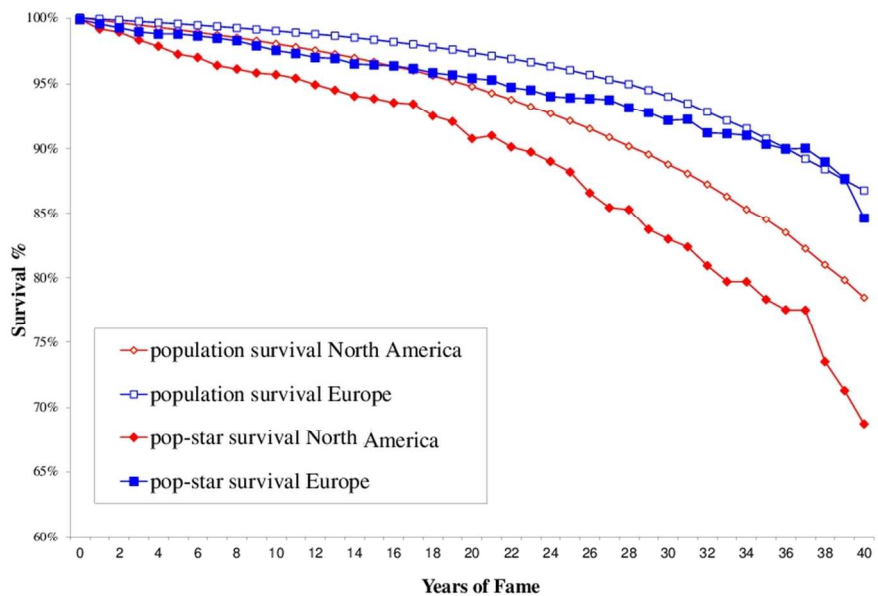

Figure 2: Comparative survival curves for North American and European rock and pop stars  
119x90mm (300 x 300 DPI)

## STROBE Statement—checklist of items that should be included in reports of observational studies

|                              | Item No | Recommendation                                                                                                                                                                                                                                                                                                                                                                                                                                                         |    |
|------------------------------|---------|------------------------------------------------------------------------------------------------------------------------------------------------------------------------------------------------------------------------------------------------------------------------------------------------------------------------------------------------------------------------------------------------------------------------------------------------------------------------|----|
| Title and abstract           | 1       | (a) Indicate the study's design with a commonly used term in the title or the abstract                                                                                                                                                                                                                                                                                                                                                                                 | ✓  |
|                              |         | (b) Provide in the abstract an informative and balanced summary of what was done and what was found                                                                                                                                                                                                                                                                                                                                                                    | ✓  |
| <b>Introduction</b>          |         |                                                                                                                                                                                                                                                                                                                                                                                                                                                                        |    |
| Background/rationale         | 2       | Explain the scientific background and rationale for the investigation being reported                                                                                                                                                                                                                                                                                                                                                                                   | ✓  |
| Objectives                   | 3       | State specific objectives, including any prespecified hypotheses                                                                                                                                                                                                                                                                                                                                                                                                       | ✓  |
| <b>Methods</b>               |         |                                                                                                                                                                                                                                                                                                                                                                                                                                                                        |    |
| Study design                 | 4       | Present key elements of study design early in the paper                                                                                                                                                                                                                                                                                                                                                                                                                | ✓  |
| Setting                      | 5       | Describe the setting, locations, and relevant dates, including periods of recruitment, exposure, follow-up, and data collection                                                                                                                                                                                                                                                                                                                                        | ✓  |
| Participants                 | 6       | (a) <i>Cohort study</i> —Give the eligibility criteria, and the sources and methods of selection of participants. Describe methods of follow-up<br><i>Case-control study</i> —Give the eligibility criteria, and the sources and methods of case ascertainment and control selection. Give the rationale for the choice of cases and controls<br><i>Cross-sectional study</i> —Give the eligibility criteria, and the sources and methods of selection of participants | ✓  |
|                              |         | (b) <i>Cohort study</i> —For matched studies, give matching criteria and number of exposed and unexposed<br><i>Case-control study</i> —For matched studies, give matching criteria and the number of controls per case                                                                                                                                                                                                                                                 | ✓  |
| Variables                    | 7       | Clearly define all outcomes, exposures, predictors, potential confounders, and effect modifiers. Give diagnostic criteria, if applicable                                                                                                                                                                                                                                                                                                                               | ✓  |
| Data sources/<br>measurement | 8*      | For each variable of interest, give sources of data and details of methods of assessment (measurement). Describe comparability of assessment methods if there is more than one group                                                                                                                                                                                                                                                                                   | ✓  |
| Bias                         | 9       | Describe any efforts to address potential sources of bias                                                                                                                                                                                                                                                                                                                                                                                                              | ✓  |
| Study size                   | 10      | Explain how the study size was arrived at                                                                                                                                                                                                                                                                                                                                                                                                                              | ✓  |
| Quantitative variables       | 11      | Explain how quantitative variables were handled in the analyses. If applicable, describe which groupings were chosen and why                                                                                                                                                                                                                                                                                                                                           | ✓  |
| Statistical methods          | 12      | (a) Describe all statistical methods, including those used to control for confounding                                                                                                                                                                                                                                                                                                                                                                                  | ✓  |
|                              |         | (b) Describe any methods used to examine subgroups and interactions                                                                                                                                                                                                                                                                                                                                                                                                    | ✓  |
|                              |         | (c) Explain how missing data were addressed                                                                                                                                                                                                                                                                                                                                                                                                                            | ✓  |
|                              |         | (d) <i>Cohort study</i> —If applicable, explain how loss to follow-up was addressed<br><i>Case-control study</i> —If applicable, explain how matching of cases and controls was addressed<br><i>Cross-sectional study</i> —If applicable, describe analytical methods taking account of sampling strategy                                                                                                                                                              | NA |
|                              |         | (e) Describe any sensitivity analyses                                                                                                                                                                                                                                                                                                                                                                                                                                  |    |

| <b>Results</b>           |     |                                                                                                                                                                                                                                                                                                 |    |
|--------------------------|-----|-------------------------------------------------------------------------------------------------------------------------------------------------------------------------------------------------------------------------------------------------------------------------------------------------|----|
| Participants             | 13* | (a) Report numbers of individuals at each stage of study—eg numbers potentially eligible, examined for eligibility, confirmed eligible, included in the study, completing follow-up, and analysed<br>(b) Give reasons for non-participation at each stage<br>(c) Consider use of a flow diagram | ✓  |
| Descriptive data         | 14* | (a) Give characteristics of study participants (eg demographic, clinical, social) and information on exposures and potential confounders                                                                                                                                                        | ✓  |
|                          |     | (b) Indicate number of participants with missing data for each variable of interest                                                                                                                                                                                                             | NA |
|                          |     | (c) <i>Cohort study</i> —Summarise follow-up time (eg, average and total amount)                                                                                                                                                                                                                | NA |
| Outcome data             | 15* | <i>Cohort study</i> —Report numbers of outcome events or summary measures over time                                                                                                                                                                                                             | ✓  |
|                          |     | <i>Case-control study</i> —Report numbers in each exposure category, or summary measures of exposure                                                                                                                                                                                            |    |
|                          |     | <i>Cross-sectional study</i> —Report numbers of outcome events or summary measures                                                                                                                                                                                                              |    |
| Main results             | 16  | (a) Give unadjusted estimates and, if applicable, confounder-adjusted estimates and their precision (eg, 95% confidence interval). Make clear which confounders were adjusted for and why they were included                                                                                    | ✓  |
|                          |     | (b) Report category boundaries when continuous variables were categorized                                                                                                                                                                                                                       | ✓  |
|                          |     | (c) If relevant, consider translating estimates of relative risk into absolute risk for a meaningful time period                                                                                                                                                                                | NA |
| Other analyses           | 17  | Report other analyses done—eg analyses of subgroups and interactions, and sensitivity analyses                                                                                                                                                                                                  | ✓  |
| <b>Discussion</b>        |     |                                                                                                                                                                                                                                                                                                 |    |
| Key results              | 18  | Summarise key results with reference to study objectives                                                                                                                                                                                                                                        | ✓  |
| Limitations              | 19  | Discuss limitations of the study, taking into account sources of potential bias or imprecision. Discuss both direction and magnitude of any potential bias                                                                                                                                      | ✓  |
| Interpretation           | 20  | Give a cautious overall interpretation of results considering objectives, limitations, multiplicity of analyses, results from similar studies, and other relevant evidence                                                                                                                      | ✓  |
| Generalisability         | 21  | Discuss the generalisability (external validity) of the study results                                                                                                                                                                                                                           | ✓  |
| <b>Other information</b> |     |                                                                                                                                                                                                                                                                                                 |    |
| Funding                  | 22  | Give the source of funding and the role of the funders for the present study and, if applicable, for the original study on which the present article is based                                                                                                                                   | ✓  |

\*Give information separately for cases and controls in case-control studies and, if applicable, for exposed and unexposed groups in cohort and cross-sectional studies.

**Note:** An Explanation and Elaboration article discusses each checklist item and gives methodological background and published examples of transparent reporting. The STROBE checklist is best used in conjunction with this article (freely available on the Web sites of PLoS Medicine at <http://www.plosmedicine.org/>, Annals of Internal Medicine at <http://www.annals.org/>, and Epidemiology at <http://www.epidem.com/>). Information on the STROBE Initiative is available at [www.strobe-statement.org](http://www.strobe-statement.org).
